# Supplementary material for: Metabolomic analyses reveal new stage-specific features of COVID-19
Source: PubMed Central journal article supplement — Eur Respir J. 2022 Feb 24;59(2):2100284. doi: 10.1183/13993003.00284-2021 (PMC8311281; doi:10.1183/13993003.00284-2021), 2022-02-24
Supplement: ERJ-00284-2021.Tables.pdf [file ERJ-00284-2021.Tables.pdf]

**Table S1. Definitions of clinical types of COVID-19 in adult patients**

|                 |                                                                                                                                                                                                                                                                                                                                                                                                                                                                                               |
|-----------------|-----------------------------------------------------------------------------------------------------------------------------------------------------------------------------------------------------------------------------------------------------------------------------------------------------------------------------------------------------------------------------------------------------------------------------------------------------------------------------------------------|
| <b>Mild</b>     | <ul style="list-style-type: none"><li>• Upper respiratory symptoms (eg, pharyngeal congestion, sore throat, and fever) for a short duration or asymptomatic infection</li><li>• Positive RT-PCR test for SARS-CoV-2</li><li>• No abnormal radiographic and septic presentation</li></ul>                                                                                                                                                                                                      |
| <b>Moderate</b> | <ul style="list-style-type: none"><li>• Imaging shows pneumonia.</li><li>• Symptoms such as fever, cough, fatigue, headache, and myalgia</li></ul>                                                                                                                                                                                                                                                                                                                                            |
| <b>Severe</b>   | Mild or moderate clinical features, plus any manifestations that suggest disease progression: <ul style="list-style-type: none"><li>• Respiratory distress, breathing frequency <math>\geq 30</math> times/minute;</li><li>• In the resting state, it means oxygen saturation <math>\leq 93\%</math>;</li><li>• Arterial blood oxygen partial pressure (<math>\text{PaO}_2</math>)/oxygen concentration (<math>\text{FiO}_2</math>) <math>\leq 300</math> mmHg (1 mmHg = 0.133kPa).</li></ul> |
| <b>Critical</b> | Rapid disease progression, plus any other conditions: <ul style="list-style-type: none"><li>• Respiratory failure with need for mechanical ventilation (eg, ARDS, persistent hypoxia that cannot be alleviated by inhalation through nasal catheters or masks)</li><li>• Septic shock</li><li>• Organ failure that needs monitoring in the ICU</li></ul>                                                                                                                                      |

COVID-19=coronavirus disease 2019. SARS-CoV-2=severe acute respiratory syndrome coronavirus 2. ARDS=acute respiratory distress syndrome. ICU=intensive care unit.

Table S2. Metabolites detected in the discovery cohort by untargeted metabolomics

| Class       | Name                     | HMDB_ID      | KEGG_ID | Normal VS Mild |         |        |        | Normal VS Severe |        |        |       | Normal VS Recovery |        |        |        | Total  |        |
|-------------|--------------------------|--------------|---------|----------------|---------|--------|--------|------------------|--------|--------|-------|--------------------|--------|--------|--------|--------|--------|
|             |                          |              |         | P              | FDR     | log2FC | VIP    | P                | FDR    | log2FC | VIP   | P                  | FDR    | log2FC | VIP    | P      | FDR    |
| Others      | 1-methyladenosine        | HMDB0003331  | C02494  | <0.001         | <0.001  | 0.91   | 1.7671 | <0.001           | 0.001  | 0.72   | 1.417 | <0.001             | <0.001 | -1.29  | 1.5723 | <0.001 | <0.001 |
| Amino acids | N-acetyl-l-leucine       | HMDB0011756  | C02710  | <0.001         | <0.001  | 2.482  | 2.1962 | <0.001           | <0.001 | 0.933  | 1.417 | 0.0049             | 0.009  | -0.37  | 0.1649 | <0.001 | <0.001 |
| Amino acids | N-acetyl-l-phenylalanine | HMDB0000512  | C03519  | <0.001         | <0.001  | 3.14   | 2.1249 | <0.001           | 0.002  | 1.87   | 1.4   | <0.001             | <0.001 | -0.73  | 0.1835 | <0.001 | <0.001 |
| Amino acids | N-acetylproline          | HMDB0094701  | -       | <0.001         | <0.001  | 2.223  | 1.8915 | 0.611            | 0.7068 | 0.277  | 0.916 | 0.0177             | 0.030  | -0.16  | 0.2193 | <0.001 | <0.001 |
| Amino acids | 2-phenylglycine          | HMDB0002210  | -       | <0.001         | <0.001  | 2.68   | 0.6317 | 0.003            | 0.009  | 2.50   | 0.983 | <0.001             | <0.001 | 0.90   | 0.3909 | <0.001 | <0.001 |
| Amino acids | Creatinine               | HMDB0000562  | C00791  | 0.6377         | 0.71101 | 0.06   | 0.1746 | 0.005            | 0.0138 | -0.43  | 1.174 | 0.0025             | 0.005  | 0.27   | 0.6989 | <0.001 | <0.001 |
| Amino acids | N-acetyl-l-alanine       | HMDB0000766  | -       | 0.417          | 0.518   | 0.06   | 0.5434 | 0.0114           | 0.025  | 0.18   | 1.18  | <0.001             | <0.001 | 0.50   | 0.7862 | <0.001 | <0.001 |
| Amino acids | Nicotinic acid           | HMDB0003269  | C05380  | 0.65           | 0.71609 | -0.08  | 0.1592 | <0.001           | 0.0012 | 1.543  | 1.062 | 0.0016             | 0.003  | 0.65   | 0.8255 | <0.001 | <0.001 |
| Amino acids | DL-tryptophan            | HMDB0030396  | C00806  | 0.045          | 0.089   | -0.22  | 0.8762 | 0.0701           | 0.122  | -0.30  | 0.73  | 0.0133             | 0.023  | 0.26   | 0.8387 | <0.001 | <0.001 |
| Amino acids | Levothyroxine            | HMDB0000248  | C01829  | 0.0586         | 0.11279 | 0.228  | 0.7975 | 0.005            | 0.0137 | -0.59  | 1.24  | 0.001              | 0.002  | 0.40   | 0.9823 | <0.001 | <0.001 |
| Amino acids | L-allo-threonine         | HMDB0004041  | C05519  | 0.003          | 0.010   | -0.54  | 1.2911 | 0.0298           | 0.056  | -0.40  | 0.786 | 0.0033             | 0.006  | 0.41   | 0.9895 | <0.001 | <0.001 |
| Amino acids | 2-hydroxyphenylalanine   | HMDB0006050  | -       | 0.2258         | 0.31431 | -0.96  | 0.1838 | 0.110            | 0.1715 | -1.08  | 0.432 | <0.001             | <0.001 | -2.15  | 1.1783 | <0.001 | <0.001 |
| Amino acids | Leucyl proline           | HMDB0011175  | -       | 0.177          | 0.267   | 0.33   | 0.5544 | <0.001           | <0.001 | 1.17   | 1.32  | <0.001             | <0.001 | -1.05  | 1.2378 | <0.001 | <0.001 |
| Amino acids | S-lactoylglutathione     | HMDB0001066  | C03451  | 0.1827         | 0.26736 | 0.039  | 0.5327 | 0.011            | 0.0254 | -0.24  | 1.068 | <0.001             | <0.001 | 0.15   | 1.1857 | <0.001 | <0.001 |
| Amino acids | L-asparagine             | HMDB0000168  | C00152  | 0.170          | 0.258   | 0.14   | 0.7073 | <0.001           | <0.001 | 0.36   | 1.311 | <0.001             | <0.001 | 0.46   | 1.4447 | <0.001 | <0.001 |
| Amino acids | 5-aminovaleric acid      | HMDB0003355  | C00431  | 0.5277         | 0.63326 | 0.071  | 0.2779 | 0.406            | 0.5089 | 0.251  | 0.675 | <0.001             | 0.002  | 0.52   | 1.107  | 0.01   | 0.0083 |
| Amino acids | L-glutamine              | HMDB0000641  | C00064  | 0.006          | 0.018   | -0.51  | 1.129  | <0.001           | 0.001  | -0.78  | 1.45  | <0.001             | <0.001 | 0.53   | 1.2554 | <0.001 | <0.001 |
| Amino acids | L-kynurenine             | HMDB0000684  | C00328  | 0.1056         | 0.1811  | 0.033  | 0.5986 | 0.004            | 0.0106 | 0.895  | 1.352 | <0.001             | <0.001 | 0.56   | 1.1805 | <0.001 | <0.001 |
| Amino acids | L-phenylalanine          | HMDB0000159  | C00079  | <0.001         | <0.001  | 0.76   | 2.0032 | <0.001           | <0.001 | 0.76   | 1.745 | <0.001             | <0.001 | 0.60   | 1.6617 | <0.001 | <0.001 |
| Amino acids | Hexanoylglycine          | HMDB0000701  | -       | 0.9843         | 0.98427 | -0.11  | 0.1943 | 0.216            | 0.3029 | -0.2   | 0.48  | <0.001             | <0.001 | 0.65   | 1.4672 | <0.001 | <0.001 |
| Amino acids | L-isoleucine             | HMDB0000172  | C00407  | 0.465          | 0.571   | 0.13   | 0.2977 | 0.2945           | 0.383  | 0.09   | 0.757 | <0.001             | <0.001 | 0.70   | 1.2506 | 0.001  | 0.0016 |
| Amino acids | L-tyrosine               | HMDB0000158  | C00082  | 0.1348         | 0.21643 | 0.297  | 0.5804 | 0.302            | 0.3899 | 0.264  | 0.588 | <0.001             | <0.001 | 0.71   | 1.112  | 0.00   | 0.0063 |
| Amino acids | L-norleucine             | HMDB0001645  | C01933  | 0.522          | 0.629   | -0.10  | 0.2963 | 0.7689           | 0.835  | -0.07  | 0.554 | <0.001             | 0.002  | 0.75   | 1.1324 | <0.001 | 0.0016 |
| Amino acids | Beta-alanine             | HMDB0000056  | C00099  | 0.6217         | 0.70196 | 0.075  | 0.2938 | 0.910            | 0.9521 | -0.03  | 0.03  | <0.001             | <0.001 | 0.76   | 1.1334 | <0.001 | <0.001 |
| Amino acids | L-proline                | HMDB0000162  | C00148  | 0.115          | 0.192   | -0.21  | 0.6577 | 0.8938           | 0.942  | 0.05   | 0.152 | <0.001             | <0.001 | 0.80   | 1.3218 | <0.001 | <0.001 |
| Amino acids | DL-serine                | HMDB0000187  | C00716  | 0.7908         | 0.82013 | 0.029  | 0.1422 | 0.650            | 0.744  | -0.21  | 0.346 | <0.001             | <0.001 | 0.87   | 1.6342 | <0.001 | <0.001 |
| Amino acids | D-aspartate              | HMDB0006483  | C00402  | <0.001         | <0.001  | 1.46   | 1.936  | <0.001           | 0.002  | 1.24   | 1.57  | <0.001             | <0.001 | 1.30   | 1.5896 | <0.001 | <0.001 |
| Amino acids | L-histidine              | HMDB0000177  | C00135  | 0.7374         | 0.77753 | 0.128  | 0.2918 | <0.001           | <0.001 | -0.93  | 1.636 | <0.001             | <0.001 | 1.36   | 1.6858 | <0.001 | <0.001 |
| Amino acids | L-glutamic acid          | HMDB0000148  | C00025  | <0.001         | <0.001  | 0.74   | 1.7166 | <0.001           | <0.001 | 0.90   | 1.579 | <0.001             | <0.001 | 1.44   | 1.7968 | <0.001 | <0.001 |
| Amino acids | L-lysine                 | HMDB0000182  | C00047  | 0.2107         | 0.29826 | 0.622  | 0.6883 | 0.650            | 0.744  | 0.274  | 0.566 | <0.001             | <0.001 | 2.15   | 1.7559 | <0.001 | <0.001 |
| Amino acids | N-acetylmethionine       | HMDB0011745  | C02712  | 0.258          | 0.352   | 0.25   | 0.5278 | <0.001           | <0.001 | 2.46   | 1.869 | <0.001             | <0.001 | 2.36   | 1.2883 | <0.001 | <0.001 |
| Amino acids | D-ornithine              | HMDB0003374  | C00515  | 0.1827         | 0.26736 | 0.563  | 0.8691 | 0.005            | 0.0122 | 0.911  | 1.442 | <0.001             | <0.001 | 3.47   | 1.6865 | <0.001 | <0.001 |
| Amino acids | N-acetylorithine         | HMDB0003357  | C00437  | <0.001         | <0.001  | 4.60   | 1.7166 | <0.001           | <0.001 | 4.01   | 1.631 | <0.001             | <0.001 | 5.04   | 1.3389 | <0.001 | <0.001 |
| Amino acids | 3-methoxytyrosine        | HMDB0001434  | -       | 0.5145         | 0.62333 | -0.12  | 0.2264 | 0.087            | 0.1429 | -0.38  | 0.583 | 0.036              | 0.058  | -0.53  | 0.1469 | 0.16   | 0.1754 |
| Amino acids | Betaine                  | HMDB0000043  | C00719  | 0.038          | 0.078   | 0.47   | 0.9209 | 0.1053           | 0.168  | -0.34  | 0.784 | 0.0413             | 0.065  | 0.32   | 0.7014 | <0.001 | 0.0015 |
| Amino acids | Creatine                 | HMDB0000064  | C00300  | 0.6629         | 0.72636 | 0.052  | 0.1356 | 0.152            | 0.2238 | 0.256  | 0.901 | 0.0522             | 0.080  | 0.18   | 0.6083 | 0.12   | 0.1378 |
| Amino acids | L-threonine              | HMDB0000167  | C00188  | 0.002          | 0.007   | -0.58  | 1.2475 | <0.001           | <0.001 | -1.08  | 1.713 | 0.0677             | 0.102  | 0.23   | 0.6784 | <0.001 | <0.001 |
| Amino acids | N-acetyl-d-tryptophan    | HMDB0013713  | -       | <0.001         | <0.001  | 1.796  | 2.0075 | <0.001           | <0.001 | 1.642  | 0.862 | 0.1098             | 0.157  | 0.23   | 0.5085 | <0.001 | <0.001 |
| Amino acids | L-threonic acid          | HMDB0062620  | C01620  | 0.011          | 0.027   | -0.91  | 1.1489 | 0.0523           | 0.093  | -0.82  | 0.721 | 0.1902             | 0.263  | -0.25  | 0.4405 | 0.0414 | 0.0519 |
| Amino acids | Cinnamoylglycine         | HMDB00011621 | -       | 0.0379         | 0.07764 | -2.32  | 0.334  | 0.005            | 0.0138 | -2.78  | 0.947 | 0.2497             | 0.331  | -1.08  | 0.4048 | 0.02   | 0.021  |
| Amino acids | 1-methylhistidine        | HMDB0000479  | C01152  | 0.097          | 0.169   | 0.42   | 0.5338 | 0.2471           | 0.331  | 0.87   | 0.757 | 0.2497             | 0.331  | 0.61   | 0.4111 | 0.3989 | 0.4103 |
| Amino acids | Capryloylglycine         | HMDB0000832  | -       | 0.0032         | 0.01018 | 0.668  | 0.383  | 0.087            | 0.1429 | -0.18  | 0.775 | 0.2653             | 0.346  | 0.13   | 0.0884 | <0.001 | <0.001 |
| Amino acids | Tyrosylalanine           | HMDB0029098  | -       | 0.006          | 0.017   | -2.11  | 1.1888 | 0.4371           | 0.537  | 1.17   | 0.073 | 0.2815             | 0.362  | 0.87   | 0.0972 | <0.001 | <0.001 |
| Amino acids | Valylproline             | HMDB0029135  | -       | 0.8792         | 0.89701 | -0.02  | 0.1011 | 0.087            | 0.1429 | 0.424  | 0.757 | 0.3719             | 0.459  | 0.08   | 0.3003 | 0.22   | 0.2352 |
| Amino acids | L-valine                 | HMDB0000883  | C00183  | 0.540          | 0.639   | -0.32  | 0.1266 | 0.2471           | 0.331  | 0.26   | 0.688 | 0.4022             | 0.487  | -0.13  | 0.3295 | 0.1933 | 0.2081 |
| Amino acids | L-tryptophan             | HMDB0000929  | C00078  | 0.0026         | 0.00898 | -0.4   | 1.2159 | 0.004            | 0.0104 | -0.57  | 1.181 | 0.4248             | 0.510  | 0.09   | 0.3291 | <0.001 | <0.001 |
| Amino acids | N-acetylvaline           | HMDB0011757  | -       | <0.001         | <0.001  | 1.68   | 2.2194 | <0.001           | 0.001  | 0.46   | 1.314 | 0.4337             | 0.518  | -0.06  | 0.2726 | <0.001 | <0.001 |
| Amino acids | Pyroglutamate            | HMDB0000267  | C01879  | 0.0032         | 0.01018 | 1.206  | 1.4344 | 0.002            | 0.006  | 0.402  | 1.317 | 0.5009             | 0.576  | 0.01   | 0.4296 | 0.00   | 0.0023 |

|             |                                     |             |        |        |         |       |        |        |        |       |       |        |        |       |        |        |        |
|-------------|-------------------------------------|-------------|--------|--------|---------|-------|--------|--------|--------|-------|-------|--------|--------|-------|--------|--------|--------|
| Amino acids | DL-2-aminocaprylic acid             | HMDB0000991 | -      | 0.046  | 0.091   | -0.76 | 0.2538 | 0.0597 | 0.104  | -1.17 | 0.458 | 0.5009 | 0.576  | -0.18 | 0.0414 | 0.0632 | 0.0766 |
| Amino acids | Glycyl-L-leucine                    | HMDB0000759 | C02155 | 0.2107 | 0.29826 | -0.67 | 0.0197 | 0.186  | 0.2679 | -0.41 | 0.348 | 0.573  | 0.650  | -0.35 | 0.1281 | 0.52   | 0.529  |
| Amino acids | N-                                  | HMDB0006344 | C04148 | 0.708  | 0.756   | 0.52  | 0.3379 | 0.1095 | 0.171  | 1.12  | 0.693 | 0.5981 | 0.667  | -0.63 | 0.1994 | 0.1812 | 0.196  |
| Amino acids | L-arginine                          | HMDB0000517 | C00062 | 0.5827 | 0.67983 | -0.07 | 0.2749 | <0.001 | 0.0015 | -0.78 | 1.341 | 0.6093 | 0.676  | -0.07 | 0.1231 | <0.001 | <0.001 |
| Amino acids | N-methyl-L-glutamate                | HMDB0062660 | C01046 | 0.022  | 0.051   | 0.34  | 0.7411 | 0.0135 | 0.029  | 0.43  | 1.185 | 0.7029 | 0.757  | 0.12  | 0.2237 | 0.0083 | 0.0117 |
| Benzenoids  | 3-hydroxybenzoate                   | HMDB0002466 | C00587 | 0.3318 | 0.43551 | 4.07  | 1.1504 | 1.000  | 1      | 5.667 | 1.33  | 0.0037 | 0.007  | -0.36 | 0.0483 | 0.10   | 0.1132 |
| Benzenoids  | Homogentisate                       | HMDB0000130 | C00544 | 0.146  | 0.227   | -0.44 | 0.6064 | 0.9362 | 0.958  | 0.36  | 0.583 | 0.0029 | 0.006  | 3.37  | 0.1422 | <0.001 | <0.001 |
| Benzenoids  | 4-hydroxybenzoate                   | HMDB0000500 | C00156 | <0.001 | <0.001  | -0.58 | 0.3252 | 0.001  | 0.0041 | -0.44 | 0.411 | <0.001 | 0.002  | -0.39 | 0.2614 | <0.001 | <0.001 |
| Benzenoids  | 3,4-dihydroxyphenyl glycol          | HMDB0000318 | C05576 | 0.075  | 0.138   | -0.17 | 0.5729 | 0.2254 | 0.307  | -0.24 | 0.211 | 0.0055 | 0.010  | -0.10 | 0.4837 | 0.1069 | 0.1214 |
| Benzenoids  | 4-ethylphenol                       | HMDB0029306 | C13637 | 0.0379 | 0.07764 | -0.53 | 0.2892 | 0.030  | 0.0561 | -0.46 | 0.463 | <0.001 | <0.001 | -0.54 | 0.5119 | 0.01   | 0.0121 |
| Benzenoids  | 4-methylcatechol                    | HMDB0000873 | C06730 | 0.115  | 0.192   | -1.53 | 0.1384 | <0.001 | <0.001 | -3.94 | 1.167 | <0.001 | 0.002  | -2.94 | 0.5902 | <0.001 | 0.0012 |
| Benzenoids  | Anthranilic acid                    | HMDB0001123 | C00108 | <0.001 | <0.001  | 0.926 | 1.6657 | <0.001 | <0.001 | 0.983 | 1.209 | 0.0243 | 0.040  | 0.14  | 0.6255 | <0.001 | <0.001 |
| Benzenoids  | Dihydroxymandelic acid              | HMDB0001866 | C05580 | 0.275  | 0.369   | -0.62 | 0.2896 | 0.0066 | 0.016  | -2.50 | 0.921 | 0.0029 | 0.006  | -1.73 | 0.6349 | 0.0067 | 0.0095 |
| Benzenoids  | Mandelate                           | HMDB0000703 | C01984 | 0.1056 | 0.1811  | -0.38 | 0.2688 | 0.769  | 0.8352 | -0.02 | 0.287 | <0.001 | <0.001 | -1.90 | 0.9602 | <0.001 | <0.001 |
| Benzenoids  | Monobutyl phthalate                 | HMDB0013247 | -      | <0.001 | 0.003   | -1.55 | 0.2536 | <0.001 | <0.001 | -2.10 | 0.973 | <0.001 | <0.001 | -2.57 | 0.9983 | <0.001 | <0.001 |
| Benzenoids  | 4-hydroxyphenylpyruvic acid         | HMDB0000707 | C01179 | <0.001 | <0.001  | -1.76 | 1.8922 | 0.001  | 0.0039 | -1.05 | 1.444 | <0.001 | <0.001 | -6.71 | 1.831  | <0.001 | <0.001 |
| Benzenoids  | Mono(2-ethylhexyl) phthalate (mehp) | HMDB0013248 | C03343 | <0.001 | <0.001  | -2.55 | 2.0726 | 0.022  | 0.045  | -2.04 | 0.417 | <0.001 | <0.001 | -2.96 | 1.692  | <0.001 | <0.001 |
| Benzenoids  | 2-methylhippuric acid               | HMDB0011723 | -      | <0.001 | <0.001  | 2.048 | 1.4231 | <0.001 | <0.001 | 1.176 | 1.737 | <0.001 | <0.001 | -2.36 | 1.4519 | <0.001 | <0.001 |
| Benzenoids  | Isohomovanillic acid                | HMDB0000333 | -      | <0.001 | <0.001  | -1.73 | 0.4035 | <0.001 | <0.001 | -1.92 | 1.789 | <0.001 | <0.001 | -2.19 | 1.6784 | <0.001 | <0.001 |
| Benzenoids  | 3-hydroxyanthranilic acid           | HMDB0001476 | C00632 | <0.001 | <0.001  | -1.43 | 0.0512 | <0.001 | <0.001 | -1.4  | 1.772 | <0.001 | <0.001 | -1.62 | 1.677  | <0.001 | <0.001 |
| Benzenoids  | 4-hydroxybenzaldehyde               | HMDB0011718 | C00633 | <0.001 | <0.001  | -0.63 | 1.7356 | 0.5743 | 0.676  | -0.13 | 0.07  | <0.001 | <0.001 | -1.54 | 1.8088 | <0.001 | <0.001 |
| Benzenoids  | Epinephrine                         | HMDB0000068 | C00788 | 0.0122 | 0.03051 | 0.656 | 1.0316 | 0.852  | 0.9095 | -0.04 | 0.64  | <0.001 | <0.001 | -1.31 | 1.6769 | <0.001 | <0.001 |
| Benzenoids  | DL-metanephrine                     | HMDB0062493 | C05588 | 0.002  | 0.008   | 1.20  | 1.0865 | 0.0768 | 0.131  | 0.38  | 0.972 | <0.001 | <0.001 | -1.27 | 1.458  | <0.001 | <0.001 |
| Benzenoids  | Phenyl acetate                      | HMDB0040733 | C00548 | 0.0056 | 0.01663 | -0.34 | 0.2274 | 0.001  | 0.0041 | -0.47 | 1.352 | <0.001 | 0.002  | -0.36 | 1.144  | 0.00   | 0.0031 |
| Benzenoids  | 4-aminobenzoic acid                 | HMDB0001392 | C00568 | <0.001 | 0.001   | 0.86  | 0.9169 | 0.1105 | 0.172  | 0.16  | 0.771 | <0.001 | <0.001 | 0.38  | 1.2497 | <0.001 | <0.001 |
| Benzenoids  | 4'-hydroxydiclofenac                | HMDB0013974 | -      | 0.5941 | 0.68671 | 0.037 | 0.3495 | 0.168  | 0.2452 | 0.176 | 0.635 | 0.0327 | 0.053  | 0.13  | 0.7607 | 0.16   | 0.174  |
| Benzenoids  | 2-hydroxyhippuric acid              | HMDB0000840 | C07588 | 0.018  | 0.042   | -1.32 | 0.3275 | 0.7283 | 0.819  | -0.03 | 0.481 | 0.1474 | 0.209  | 0.51  | 0.2863 | 0.0134 | 0.018  |
| Benzenoids  | 2-quinolinecarboxylic acid          | HMDB0000842 | C06325 | 0.0758 | 0.13946 | -0.49 | 0.8929 | 0.035  | 0.063  | 0.727 | 0.652 | 0.1998 | 0.275  | 0.33  | 0.3889 | 0.00   | 0.0031 |
| Benzenoids  | 2,4-dihydroxybenzoic acid           | HMDB0029666 | -      | <0.001 | <0.001  | -1.51 | 1.5378 | 0.1095 | 0.171  | -1.71 | 0.693 | 0.2815 | 0.362  | 0.27  | 0.5249 | <0.001 | <0.001 |
| Benzenoids  | Monomethyl phthalate                | HMDB0002130 | -      | 0.6045 | 0.69555 | -0.04 | 0.2424 | 0.470  | 0.5717 | 0.123 | 0.678 | 0.2815 | 0.362  | 0.07  | 0.4408 | 0.33   | 0.3405 |
| Benzenoids  | Hippurate                           | HMDB0000714 | C01586 | 0.025  | 0.055   | -2.06 | 0.6406 | 0.7689 | 0.835  | -0.06 | 0.349 | 0.3157 | 0.402  | -0.55 | 0.2615 | 0.0855 | 0.1004 |
| Benzenoids  | Phenol                              | HMDB0013674 | C00146 | 0.0307 | 0.06731 | -0.74 | 0.1758 | 0.008  | 0.0192 | -1.6  | 0.041 | 0.3919 | 0.477  | -0.35 | 0.1255 | 0.01   | 0.0155 |
| Benzenoids  | 4-toluic acid                       | HMDB0029635 | C01454 | 0.046  | 0.091   | 0.38  | 0.4689 | 0.1519 | 0.224  | 0.50  | 0.566 | 0.5009 | 0.576  | 0.03  | 0.0434 | 0.065  | 0.078  |
| Benzenoids  | 4-methylphenol                      | HMDB0001858 | C01468 | 0.7374 | 0.77753 | 0.679 | 0.5414 | 0.347  | 0.44   | -1.26 | 0.427 | 0.8989 | 0.917  | 0.12  | 0.3156 | 0.85   | 0.8603 |
| Bile acids  | Taurocholic acid                    | HMDB0000036 | C05122 | 0.038  | 0.078   | 1.00  | 0.0116 | 0.0016 | 0.005  | 2.79  | 0.784 | 0.0297 | 0.048  | 0.51  | 0.0192 | 0.0018 | 0.0028 |
| Bile acids  | Deoxycholic acid                    | HMDB0000626 | C04483 | 0.2416 | 0.33448 | 0.41  | 0.6297 | 0.205  | 0.2888 | -0.63 | 0.668 | <0.001 | <0.001 | 0.95  | 1.0923 | <0.001 | <0.001 |
| Bile acids  | Glycocholic acid                    | HMDB0000331 | C01921 | 0.798  | 0.820   | 0.35  | 0.0392 | 0.0257 | 0.051  | 2.00  | 0.614 | 0.2497 | 0.331  | -0.23 | 0.2416 | 0.0132 | 0.0178 |
| Bile acids  | Glycoursodeoxycholic acid           | HMDB0000708 | -      | 0.1697 | 0.25761 | 0.781 | 0.5725 | 0.019  | 0.0388 | 2.16  | 1.044 | 0.3338 | 0.421  | 0.88  | 0.4162 | 0.06   | 0.0772 |
| Bile acids  | Cholate                             | HMDB0000619 | C00695 | 0.373  | 0.477   | -0.03 | 0.7301 | 0.5382 | 0.643  | 0.13  | 0.442 | 0.5981 | 0.667  | 0.08  | 0.343  | 0.2895 | 0.304  |
| Bile acids  | Glycocholate                        | HMDB0000138 | C01921 | 0.6217 | 0.70196 | 0.231 | 0.1298 | 0.011  | 0.0254 | 2.247 | 0.69  | 0.6237 | 0.683  | 0.07  | 0.2939 | 0.02   | 0.0206 |
| Bile acids  | Taurolithocholic acid 3-sulfate     | HMDB0002580 | C03642 | 0.226  | 0.314   | 0.99  | 0.552  | 0.9362 | 0.958  | -0.34 | 0.13  | 0.6237 | 0.683  | -1.36 | 0.0171 | 0.3032 | 0.317  |
| Bile acids  | Taurochenodeoxycholic acid          | HMDB0000951 | C05465 | 0.1458 | 0.22681 | 1.202 | 0.478  | <0.001 | 0.0028 | 2.331 | 1.225 | 0.73   | 0.776  | -0.45 | 0.1752 | <0.001 | 0.0013 |

|                |                                        |             |        |        |         |       |        |        |        |       |       |        |        |       |        |        |        |
|----------------|----------------------------------------|-------------|--------|--------|---------|-------|--------|--------|--------|-------|-------|--------|--------|-------|--------|--------|--------|
| Bile acids     | Glycochenodeoxycholol                  | HMDB0000637 | C05466 | 0.226  | 0.314   | 0.43  | 0.6022 | 0.0298 | 0.056  | 0.94  | 1.021 | 0.8989 | 0.917  | -0.21 | 0.35   | 0.1312 | 0.1469 |
| Biotin         | Biotin                                 | HMDB0000030 | C00120 | 0.128  | 0.20815 | -0.1  | 0.6879 | 0.936  | 0.9584 | -0.01 | 0.706 | <0.001 | <0.001 | 0.35  | 1.3106 | <0.001 | <0.001 |
| Carbohydrates  | Alpha-d-glucose                        | HMDB0003345 | C00267 | 0.010  | 0.024   | 0.67  | 0.9927 | <0.001 | 0.003  | -0.54 | 1.069 | 0.0219 | 0.037  | -0.18 | 0.4208 | <0.001 | <0.001 |
| Carbohydrates  | D-lyxose                               | HMDB0003402 | C00476 | <0.001 | <0.001  | 0.822 | 1.4656 | 0.005  | 0.0138 | -0.48 | 1.21  | 0.0049 | 0.009  | -0.29 | 0.7102 | <0.001 | <0.001 |
| Carbohydrates  | Muramic acid                           | HMDB0003254 | -      | 0.708  | 0.756   | 0.12  | 0.1443 | 0.0257 | 0.051  | -0.74 | 0.809 | <0.001 | <0.001 | -5.13 | 1.8269 | <0.001 | <0.001 |
| Carbohydrates  | N-acetylneuraminic acid                | HMDB0000773 | C19909 | <0.001 | <0.001  | 1.963 | 1.113  | <0.001 | <0.001 | 2.308 | 1.694 | <0.001 | <0.001 | -4.34 | 1.7562 | <0.001 | <0.001 |
| Carbohydrates  | D-glucosamine                          | HMDB0030091 | C08349 | 0.737  | 0.778   | 0.08  | 0.3633 | 0.8517 | 0.909  | 0.03  | 0.05  | <0.001 | <0.001 | -2.64 | 1.8273 | <0.001 | <0.001 |
| Carbohydrates  | N-acetylneuraminate                    | HMDB0000230 | C00270 | 0.0564 | 0.10932 | 0.545 | 0.9743 | 0.002  | 0.006  | 0.893 | 0.963 | <0.001 | <0.001 | -2.21 | 1.4997 | <0.001 | <0.001 |
| Carbohydrates  | Gluconic acid                          | HMDB0000625 | C00257 | <0.001 | <0.001  | 0.49  | 1.2811 | <0.001 | <0.001 | 1.61  | 0.825 | <0.001 | <0.001 | 2.01  | 1.4428 | <0.001 | <0.001 |
| Cinnamic acids | Caffeic acid                           | HMDB0001964 | C01197 | 0.0816 | 0.14785 | -1.02 | 0.9003 | 0.137  | 0.2049 | -1.03 | 0.853 | 0.0396 | 0.063  | -0.83 | 0.9795 | 0.18   | 0.1918 |
| Cinnamic acids | Sinapinic acid                         | HMDB0032616 | C00482 | 0.417  | 0.518   | 0.04  | 0.3123 | 0.0523 | 0.093  | 1.22  | 0.7   | 0.5244 | 0.598  | 0.02  | 0.3008 | 0.0555 | 0.0682 |
| Cinnamic acids | Trans-cinnamate                        | HMDB0000930 | C00423 | <0.001 | <0.001  | 2.163 | 1.5915 | <0.001 | 0.0022 | -1.54 | 0.059 | <0.001 | <0.001 | -1.68 | 1.6046 | <0.001 | <0.001 |
| Fatty acids    | Lauric acid                            | HMDB0000638 | C02679 | 0.183  | 0.267   | -0.24 | 0.5214 | <0.001 | <0.001 | -0.89 | 1.486 | 0.0177 | 0.030  | -0.71 | 0.1695 | <0.001 | <0.001 |
| Fatty acids    | Glutaryl carnitine                     | HMDB0013130 | -      | <0.001 | <0.001  | 2.293 | 1.5109 | 0.008  | 0.0192 | 1.095 | 1.122 | <0.001 | <0.001 | -2.48 | 0.3866 | <0.001 | <0.001 |
| Fatty acids    | Gamma-linolenic acid                   | HMDB0003073 | C06426 | 0.567  | 0.665   | 0.06  | 0.4361 | <0.001 | 0.001  | 0.85  | 1.218 | 0.0243 | 0.040  | 0.43  | 0.5789 | 0.0011 | 0.0017 |
| Fatty acids    | Caprylic acid                          | HMDB0000482 | C06423 | 0.0084 | 0.02288 | -0.31 | 1.0097 | 0.769  | 0.8352 | 2.495 | 0.848 | 0.0127 | 0.022  | 0.32  | 0.6574 | <0.001 | <0.001 |
| Fatty acids    | Ethyl myristate                        | HMDB0034153 | -      | 0.147  | 0.227   | 0.24  | 0.6608 | 0.144  | 0.215  | -0.32 | 0.689 | 0.0297 | 0.048  | -0.57 | 0.7535 | 0.0047 | 0.0067 |
| Fatty acids    | Sulcatol                               | HMDB0030030 | C07288 | 0.0971 | 0.1687  | 0.063 | 0.697  | <0.001 | <0.001 | 1.381 | 0.807 | 0.0055 | 0.010  | 0.34  | 0.8195 | <0.001 | <0.001 |
| Fatty acids    | Dodecanedioic acid                     | HMDB0000623 | C02678 | <0.001 | <0.001  | -2.08 | 1.8519 | <0.001 | <0.001 | -1.73 | 1.528 | <0.001 | <0.001 | -2.01 | 1.0868 | <0.001 | <0.001 |
| Fatty acids    | Dethiobiotin                           | HMDB0003581 | C01909 | <0.001 | <0.001  | -2.24 | 1.898  | <0.001 | <0.001 | 1.1   | 1.281 | <0.001 | <0.001 | -1.54 | 1.3269 | <0.001 | <0.001 |
| Fatty acids    | 3-hydroxydecanoic acid                 | HMDB0002203 | -      | <0.001 | <0.001  | -0.76 | 1.4184 | 0.0298 | 0.056  | -0.34 | 1.057 | <0.001 | <0.001 | -1.34 | 1.0914 | <0.001 | <0.001 |
| Fatty acids    | 16-hydroxyhexadecanoic                 | HMDB0006294 | C18218 | 0.0095 | 0.02444 | 0.47  | 1.0618 | 0.574  | 0.6763 | -0.25 | 0.508 | <0.001 | <0.001 | -1.03 | 1.6345 | <0.001 | <0.001 |
| Fatty acids    | Arachidonic acid                       | HMDB0001043 | C00219 | 0.344  | 0.449   | 0.14  | 0.4782 | 0.131  | 0.200  | -0.25 | 0.631 | <0.001 | <0.001 | -0.69 | 1.2291 | <0.001 | <0.001 |
| Fatty acids    | Isobutyric acid                        | HMDB0001873 | C02632 | 0.0197 | 0.04598 | 0.176 | 0.8373 | 0.023  | 0.0463 | -0.17 | 1.011 | <0.001 | <0.001 | 0.20  | 1.1638 | <0.001 | <0.001 |
| Fatty acids    | Adipate                                | HMDB0000448 | C06104 | <0.001 | <0.001  | 0.97  | 0.8606 | <0.001 | <0.001 | 1.75  | 1.27  | <0.001 | <0.001 | 0.34  | 1.4453 | <0.001 | <0.001 |
| Fatty acids    | 6-carboxyhexanoate                     | HMDB0000857 | C02656 | <0.001 | <0.001  | 0.827 | 1.6822 | <0.001 | <0.001 | 2.908 | 1.251 | <0.001 | <0.001 | 0.41  | 1.3402 | <0.001 | <0.001 |
| Fatty acids    | Hexadecanamide                         | HMDB0012273 | -      | <0.001 | <0.001  | 1.26  | 1.7976 | 0.0257 | 0.051  | 0.34  | 1.062 | <0.001 | <0.001 | 0.62  | 1.1851 | <0.001 | <0.001 |
| Fatty acids    | Sebacic acid                           | HMDB0000792 | C08277 | <0.001 | <0.001  | 1.671 | 1.7722 | <0.001 | <0.001 | 3.5   | 0.628 | <0.001 | <0.001 | 2.27  | 1.2847 | <0.001 | <0.001 |
| Fatty acids    | Oleamide                               | HMDB0002117 | C19670 | <0.001 | <0.001  | 2.33  | 1.6724 | 0.0976 | 0.158  | -0.58 | 0.046 | <0.001 | 0.002  | 2.31  | 1.2424 | <0.001 | <0.001 |
| Fatty acids    | Palmitoyl carnitine                    | HMDB0000222 | C02990 | 0.3732 | 0.47744 | 0.321 | 0.3425 | 0.005  | 0.0122 | 0.937 | 1.21  | <0.001 | <0.001 | 2.62  | 1.6591 | <0.001 | <0.001 |
| Fatty acids    | Hexanoyl carnitine                     | HMDB0000705 | -      | 0.679  | 0.740   | 0.29  | 0.3606 | 0.0345 | 0.063  | 1.71  | 0.89  | <0.001 | <0.001 | 2.78  | 1.2845 | <0.001 | <0.001 |
| Fatty acids    | Azelaic acid                           | HMDB0000784 | C08261 | <0.001 | <0.001  | 3.717 | 1.5742 | <0.001 | <0.001 | 6.575 | 1.122 | <0.001 | <0.001 | 2.80  | 1.7577 | <0.001 | <0.001 |
| Fatty acids    | Propionyl carnitine                    | HMDB0000824 | C03017 | 0.001  | 0.005   | 1.35  | 0.6504 | <0.001 | 0.002  | 2.53  | 1.289 | <0.001 | <0.001 | 6.67  | 1.5714 | <0.001 | <0.001 |
| Fatty acids    | O-acetylcarnitine                      | HMDB0000201 | C02571 | 0.0095 | 0.02444 | 0.5   | 0.5734 | 0.137  | 0.2049 | 0.328 | 0.833 | <0.001 | <0.001 | 10.15 | 1.3234 | <0.001 | <0.001 |
| Fatty acids    | Oleate                                 | HMDB0000207 | C00712 | 0.016  | 0.040   | 0.45  | 1.0761 | 0.5033 | 0.604  | 0.23  | 0.487 | 0.0531 | 0.081  | 0.35  | 0.654  | 0.0911 | 0.1057 |
| Fatty acids    | Lauroyl carnitine                      | HMDB0002250 | -      | 0.1963 | 0.28269 | -0.15 | 0.8379 | 0.503  | 0.604  | -0.21 | 0.503 | 0.0737 | 0.109  | 1.01  | 0.5453 | <0.001 | 0.001  |
| Fatty acids    | 8z,11z,14z-eicosatrienoic acid         | HMDB0002925 | C03242 | 0.002  | 0.007   | 0.58  | 1.2425 | 0.0045 | 0.012  | 0.45  | 1.198 | 0.0868 | 0.127  | 0.41  | 0.5451 | 0.0136 | 0.0182 |
| Fatty acids    | Linoleic acid                          | HMDB0000673 | C01595 | 0.1835 | 0.26736 | 0.3   | 0.6703 | 0.769  | 0.8352 | -0.12 | 0.023 | 0.1001 | 0.145  | -0.43 | 0.5959 | 0.01   | 0.0169 |
| Fatty acids    | Decanoic acid                          | HMDB0000511 | C01571 | 0.008  | 0.023   | -0.34 | 1.1473 | 0.4371 | 0.537  | 2.57  | 0.874 | 0.1098 | 0.157  | -0.22 | 0.1429 | 0.07   | 0.0832 |
| Fatty acids    | L-carnitine                            | HMDB0000062 | C00318 | <0.001 | 0.00254 | 0.822 | 1.3897 | <0.001 | 0.0012 | 2.076 | 1.311 | 0.1275 | 0.182  | 0.06  | 0.5486 | <0.001 | <0.001 |
| Fatty acids    | 3-hydroxybutanoate                     | HMDB0000011 | C01089 | 0.275  | 0.369   | 0.11  | 0.7747 | 0.2254 | 0.307  | -0.53 | 0.315 | 0.1813 | 0.252  | -0.24 | 0.1169 | 0.0406 | 0.0512 |
| Fatty acids    | DL-carnitine                           | HMDB0002095 | -      | 0.2107 | 0.29826 | 0.054 | 0.4612 | 0.728  | 0.8194 | 0.033 | 0.065 | 0.2205 | 0.300  | -0.18 | 0.384  | 0.18   | 0.196  |
| Fatty acids    | 9-oxo-10(e),12(e)-octadecadienoic acid | HMDB0004669 | C14766 | 0.312  | 0.416   | 0.33  | 0.2066 | 0.0345 | 0.063  | 0.88  | 0.791 | 0.3157 | 0.402  | 0.38  | 0.2903 | 0.148  | 0.1643 |
| Fatty acids    | 4-hydroxybutyric acid (ghb)            | HMDB0000710 | C00989 | <0.001 | <0.001  | 1.431 | 1.5597 | 0.347  | 0.44   | 0.341 | 0.665 | 0.3526 | 0.438  | 0.30  | 0.4016 | <0.001 | <0.001 |
| Fatty acids    | Cis-5,8,11,14,17-eicosapentaenoic acid | HMDB0001999 | C06428 | 0.146  | 0.227   | 0.30  | 0.5911 | 0.8938 | 0.942  | -0.15 | 0.361 | 0.3526 | 0.438  | -0.04 | 0.4888 | 0.4554 | 0.4665 |
| Fatty acids    | Decanoyl carnitine                     | HMDB0000651 | -      | 0.0681 | 0.12878 | -0.85 | 0.8955 | 0.979  | 0.9865 | 0.008 | 0.16  | 0.3526 | 0.438  | 1.17  | 0.3485 | 0.01   | 0.0107 |

|                       |                                                |             |        |        |         |       |        |        |        |       |       |        |        |       |        |        |        |
|-----------------------|------------------------------------------------|-------------|--------|--------|---------|-------|--------|--------|--------|-------|-------|--------|--------|-------|--------|--------|--------|
|                       | 3-hydroxy-3-                                   |             |        |        |         |       |        |        |        |       |       |        |        |       |        |        |        |
| Fatty acids           | methylbutanoic acid                            | HMDB0000754 | C20827 | 0.183  | 0.267   | 0.15  | 0.8034 | 0.2701 | 0.356  | -0.58 | 0.293 | 0.5244 | 0.598  | -0.14 | 0.0665 | 0.0856 | 0.1004 |
| Fatty acids           | Palmitoleic acid                               | HMDB0003229 | C08362 | 0.9533 | 0.96482 | 0.015 | 0.1129 | 0.755  | 0.8352 | -0.11 | 0.154 | 0.675  | 0.730  | 0.10  | 0.1503 | 0.90   | 0.9062 |
| Fatty acids           | Hexadecanedioic acid                           | HMDB0000672 | C19615 | 0.708  | 0.756   | 0.04  | 0.4163 | 0.2701 | 0.356  | 0.15  | 0.563 | 0.7575 | 0.802  | -0.35 | 0.1767 | 0.5165 | 0.527  |
| Fatty acids           | Suberic acid                                   | HMDB0000893 | C08278 | 0.0379 | 0.07764 | 0.514 | 0.9295 | <0.001 | <0.001 | 1.645 | 0.896 | 0.7853 | 0.828  | -0.06 | 0.1647 | <0.001 | <0.001 |
| Fatty acids           | Methyl jasmonate                               | HMDB0036583 | C11512 | 0.125  | 0.204   | 0.42  | 0.7495 | 0.0016 | 0.005  | -1.32 | 1.322 | 0.8134 | 0.851  | -0.10 | 0.2372 | <0.001 | <0.001 |
| Fatty acids           | Tetradecanedioic acid                          | HMDB0000872 | -      | 0.9215 | 0.93635 | 0.305 | 0.4043 | 0.769  | 0.8352 | 0.102 | 0.168 | 0.9566 | 0.960  | 0.35  | 0.3924 | 0.99   | 0.9947 |
| Hydroxycinnamic acids | 2-hydroxycinnamic acid                         | HMDB0002641 | C01772 | 0.115  | 0.192   | 0.32  | 0.5918 | 0.2466 | 0.331  | 0.28  | 0.64  | <0.001 | <0.001 | 0.72  | 1.2773 | 0.0012 | 0.0019 |
| Imidazoles            | Imidazoleacetic acid                           | HMDB0002024 | C02835 | <0.001 | <0.001  | 0.903 | 1.0188 | 0.002  | 0.005  | 0.412 | 1.343 | 0.0025 | 0.005  | 0.30  | 0.8189 | <0.001 | <0.001 |
| Imidazoles            | Urocanic acid                                  | HMDB0000301 | C00785 | 0.594  | 0.687   | 0.06  | 0.5268 | 0.2945 | 0.383  | -0.23 | 0.378 | <0.001 | <0.001 | 0.92  | 1.0296 | <0.001 | <0.001 |
| Imidazoles            | Methylimidazoleacetic acid                     | HMDB0002820 | C05828 | 0.4175 | 0.51822 | 0.093 | 0.0161 | 0.003  | 0.0088 | 1.09  | 0.919 | 0.0435 | 0.068  | 0.25  | 0.2705 | 0.00   | 0.0049 |
| Indoles               | Indole-3-methyl acetate                        | HMDB0029738 | C20635 | 0.489  | 0.596   | 0.80  | 0.3416 | 0.4696 | 0.572  | -0.36 | 0.558 | 0.0197 | 0.033  | 2.46  | 0.7348 | 0.0389 | 0.0493 |
| Indoles               | Indole-3-butyric acid                          | HMDB0002096 | C11284 | 0.0036 | 0.0115  | 1.01  | 1.1482 | 0.002  | 0.0074 | 2.241 | 1.195 | <0.001 | <0.001 | 2.03  | 0.7928 | <0.001 | <0.001 |
| Indoles               | L-5-hydroxytryptophan                          | HMDB0000472 | C01017 | <0.001 | 0.003   | 0.78  | 1.208  | <0.001 | 0.003  | 1.42  | 1.328 | <0.001 | <0.001 | 0.87  | 0.9032 | <0.001 | <0.001 |
| Indoles               | Indole-3-acetamide                             | HMDB0029739 | C02693 | <0.001 | <0.001  | -2.26 | 2.1848 | 0.085  | 0.1429 | -0.38 | 0.729 | <0.001 | <0.001 | -5.69 | 1.8601 | <0.001 | <0.001 |
| Indoles               | 5-hydroxyindoleacetate                         | HMDB0000763 | C05635 | 0.007  | 0.020   | 0.47  | 0.9899 | <0.001 | 0.002  | 1.23  | 1.4   | <0.001 | <0.001 | 0.75  | 1.0693 | <0.001 | <0.001 |
| Indoles               | Indole-3-acetaldehyde                          | HMDB0001190 | C00637 | 0.0056 | 0.01663 | 0.411 | 1.0309 | <0.001 | <0.001 | 1.744 | 1.378 | <0.001 | <0.001 | 0.88  | 1.328  | <0.001 | <0.001 |
| Indoles               | N-acetylserotonin                              | HMDB0001238 | C00978 | 0.003  | 0.009   | -0.26 | 1.3275 | <0.001 | <0.001 | -0.49 | 1.547 | <0.001 | <0.001 | 3.07  | 1.0759 | <0.001 | <0.001 |
| Indoles               | Indole-3-pyruvic acid                          | HMDB0060484 | C00331 | 0.0014 | 0.00536 | -1.35 | 0.5906 | <0.001 | <0.001 | -1.64 | 1.27  | <0.001 | <0.001 | 5.66  | 1.3306 | <0.001 | <0.001 |
| Indoles               | Indole                                         | HMDB0000738 | C00463 | 0.017  | 0.041   | -0.26 | 1.0189 | 0.1225 | 0.189  | -0.32 | 0.86  | 0.057  | 0.086  | 0.16  | 0.5501 | <0.001 | 0.0011 |
| Indoles               | Indole-3-lactic acid                           | HMDB0000671 | C02043 | 0.0415 | 0.08365 | -0.32 | 0.927  | 0.002  | 0.0074 | 1.06  | 1.147 | 0.2653 | 0.346  | 0.17  | 0.4671 | <0.001 | <0.001 |
| Indoles               | Indole-3-acetic acid                           | HMDB0000197 | C00954 | <0.001 | 0.002   | -0.60 | 1.2667 | 0.5743 | 0.676  | 0.12  | 0.267 | 0.8702 | 0.899  | 0.10  | 0.2476 | 0.0018 | 0.0027 |
| Indoles               | 2-oxindole                                     | HMDB0061918 | C12312 | 0.3291 | 0.43422 | -0.28 | 0.4543 | 0.503  | 0.604  | -0.58 | 0.385 | 0.9277 | 0.939  | -0.06 | 0.1884 | 0.64   | 0.6524 |
| Lipids                | Testosterone                                   | HMDB0003193 | C11134 | <0.001 | 0.003   | 5.18  | 1.2285 | 0.0016 | 0.005  | 6.52  | 1.323 | <0.001 | <0.001 | -0.40 | 0.2127 | <0.001 | <0.001 |
| Lipids                | Desoxycortone                                  | HMDB0000016 | C03205 | <0.001 | <0.001  | 1.461 | 1.6687 | <0.001 | <0.001 | 1.497 | 1.736 | <0.001 | <0.001 | 0.94  | 0.7677 | <0.001 | <0.001 |
| Lipids                | Perillic acid                                  | HMDB0004586 | C11924 | 0.441  | 0.544   | 0.29  | 0.2569 | 0.3475 | 0.440  | -0.41 | 0.539 | 0.0127 | 0.022  | -0.72 | 0.8404 | 0.0049 | 0.007  |
| Lipids                | Testosterone sulfate                           | HMDB0002833 | -      | 0.6507 | 0.71609 | -0.14 | 0.1226 | <0.001 | 0.0022 | -1.09 | 1.489 | 0.0093 | 0.017  | -0.77 | 0.8735 | 0.01   | 0.0121 |
| Lipids                | Coenzyme q2                                    | HMDB0006709 | C00399 | 0.021  | 0.048   | 0.56  | 0.9541 | <0.001 | <0.001 | 1.75  | 1.262 | <0.001 | <0.001 | -1.74 | 0.9403 | <0.001 | <0.001 |
| Lipids                | 1-oleoyl-rac-glycerol                          | HMDB0011567 | -      | <0.001 | <0.001  | 4.417 | 1.7869 | <0.001 | <0.001 | 5.912 | 0.905 | <0.001 | <0.001 | 4.47  | 0.9459 | <0.001 | <0.001 |
| Lipids                | Palmitoyl sphingomyelin                        | HMDB0061712 | -      | <0.001 | <0.001  | 0.97  | 1.6054 | 0.1683 | 0.245  | 0.11  | 0.672 | <0.001 | <0.001 | 0.52  | 1.1082 | <0.001 | <0.001 |
| Lipids                | Alpha-tocopherol                               | HMDB0001893 | C02477 | 0.0052 | 0.01604 | 0.544 | 1.2201 | 0.295  | 0.3826 | 0.358 | 0.636 | <0.001 | <0.001 | 0.58  | 1.156  | 0.01   | 0.0184 |
| Lipids                | D-erythro-sphingosine 1-phosphate              | HMDB0000277 | C06124 | <0.001 | 0.001   | -0.45 | 1.3921 | 0.1861 | 0.268  | 0.18  | 0.787 | <0.001 | <0.001 | 0.61  | 1.3743 | <0.001 | <0.001 |
| Lipids                | Tetrahydrocortisone                            | HMDB0000903 | C05470 | 0.0816 | 0.14785 | 0.563 | 0.9128 | 0.010  | 0.0233 | 0.55  | 1.119 | <0.001 | <0.001 | 1.36  | 1.275  | <0.001 | <0.001 |
| Lipids                | Cortisol                                       | HMDB0000063 | C00735 | <0.001 | <0.001  | 1.23  | 1.5382 | <0.001 | <0.001 | 1.07  | 1.742 | <0.001 | <0.001 | 1.66  | 1.532  | <0.001 | <0.001 |
| Lipids                | Cortisone                                      | HMDB0002802 | C00762 | <0.001 | <0.001  | 0.938 | 1.4806 | 0.376  | 0.4738 | 0.254 | 0.563 | <0.001 | <0.001 | 1.99  | 1.6781 | <0.001 | <0.001 |
| Lipids                | Epitestosterone                                | HMDB0000628 | -      | 0.006  | 0.017   | 1.07  | 1.0573 | <0.001 | <0.001 | 3.11  | 0.82  | <0.001 | <0.001 | 2.01  | 1.3094 | <0.001 | <0.001 |
| Lipids                | Medroxyprogesterone 5-alpha-pregnan-3,20-dione | HMDB0001939 | C07119 | 0.089  | 0.15803 | -0.85 | 0.2758 | <0.001 | <0.001 | 4.322 | 1.933 | <0.001 | <0.001 | 4.80  | 1.2956 | <0.001 | <0.001 |
| Lipids                | Androsterone glucuronide                       | HMDB0002829 | C11135 | 0.001  | 0.00396 | -0.94 | 1.422  | 0.137  | 0.2049 | 0.715 | 0.725 | 0.3823 | 0.470  | -0.21 | 0.3158 | <0.001 | 0.001  |
| Lipids                | 19-nortestosterone                             | HMDB0002725 | C07254 | 0.650  | 0.716   | 0.40  | 0.147  | 0.0298 | 0.056  | 1.46  | 0.509 | 0.4555 | 0.534  | 0.45  | 0.0124 | 0.0345 | 0.0439 |
| Lipids                | Progesterone                                   | HMDB0001830 | C00410 | 0.0383 | 0.07778 | 0.58  | 0.8772 | 0.225  | 0.307  | -0.64 | 0.222 | 0.5981 | 0.667  | -0.25 | 0.0893 | 0.03   | 0.037  |
| Lipids                | Coenzyme q1                                    | HMDB0002012 | -      | 0.622  | 0.702   | 0.15  | 0.4405 | 0.9787 | 0.987  | -0.13 | 0.749 | 0.6237 | 0.683  | -0.22 | 0.8291 | 0.3427 | 0.354  |
| Lipids                | 2,6-di-tert-butyl-1,4-benzoquinone             | HMDB0013817 | -      | 0.1245 | 0.20373 | -0.4  | 0.3541 | 0.016  | 0.0341 | -0.54 | 0.874 | 0.73   | 0.776  | 0.36  | 0.2441 | 0.03   | 0.037  |
| Lipids                | Corticosterone                                 | HMDB0001547 | C02140 | 0.708  | 0.756   | -0.03 | 0.4355 | 0.003  | 0.009  | 0.69  | 0.784 | 0.8417 | 0.873  | -0.16 | 0.2766 | 0.0461 | 0.0575 |
| Nucleosides           | Adenosine                                      | HMDB0000050 | C00212 | <0.001 | <0.001  | -1.67 | 0.7191 | 0.098  | 0.1577 | -0.52 | 0.549 | 0.0033 | 0.006  | -1.22 | 0.5375 | <0.001 | <0.001 |

|                          |                                            |             |        |        |         |       |        |        |        |       |       |        |        |       |        |        |        |
|--------------------------|--------------------------------------------|-------------|--------|--------|---------|-------|--------|--------|--------|-------|-------|--------|--------|-------|--------|--------|--------|
| Nucleosides              | Pseudouridine                              | HMDB0000767 | C02067 | 0.417  | 0.518   | -0.13 | 0.2493 | 0.0096 | 0.023  | 0.71  | 1.355 | <0.001 | <0.001 | 0.45  | 0.728  | <0.001 | <0.001 |
| Nucleosides              | Xanthosine                                 | HMDB0000299 | C01762 | 0.0247 | 0.05509 | 0.473 | 0.8854 | <0.001 | <0.001 | 3.638 | 1.246 | <0.001 | <0.001 | 2.36  | 0.8664 | <0.001 | <0.001 |
| Nucleosides              | Angiotensin iv                             | HMDB0001038 | C15849 | 0.125  | 0.204   | -0.98 | 0.9206 | <0.001 | <0.001 | -1.42 | 2.064 | <0.001 | <0.001 | -1.86 | 1.8993 | <0.001 | <0.001 |
| Nucleosides              | 5'-methylthioadenosine                     | HMDB0001173 | C00170 | 0.0027 | 0.00924 | -0.63 | 1.2093 | 0.005  | 0.0138 | 0.743 | 0.518 | <0.001 | <0.001 | -0.56 | 1.2378 | <0.001 | <0.001 |
| Nucleosides              | Uridine                                    | HMDB0000296 | C00299 | 0.146  | 0.227   | -0.52 | 0.6057 | 0.9394 | 0.958  | -0.02 | 0.099 | 0.0057 | 0.011  | -0.55 | 1.011  | 0.0655 | 0.0782 |
| Nucleosides              | Inosine                                    | HMDB0000195 | C00294 | <0.001 | <0.001  | -3.29 | 1.5318 | 0.022  | 0.0447 | -3.58 | 0.263 | 0.0868 | 0.127  | 0.53  | 0.5281 | <0.001 | <0.001 |
| Organic acids            | 4-acetamidobutanoate                       | HMDB0003681 | C02946 | 0.146  | 0.227   | -0.28 | 0.3438 | <0.001 | 0.001  | 0.88  | 1.307 | <0.001 | <0.001 | 0.76  | 0.5725 | <0.001 | <0.001 |
| Organic acids            | Acrylic acid                               | HMDB0031647 | C00511 | <0.001 | 0.00294 | 0.672 | 1.2054 | 0.032  | 0.06   | -0.46 | 0.987 | 0.0159 | 0.027  | -0.56 | 0.6465 | <0.001 | <0.001 |
| Organic acids            | Trans-aconitic acid                        | HMDB0000958 | C02341 | 0.417  | 0.518   | -0.24 | 0.3072 | 0.6885 | 0.782  | -0.02 | 0.668 | 0.0071 | 0.013  | 0.48  | 0.6884 | 0.0126 | 0.017  |
| Organic acids            | 12-hydroxydodecanoic acid                  | HMDB0002059 | C08317 | 0.5404 | 0.63935 | -0.22 | 0.4397 | 0.007  | 0.0162 | -1.77 | 0.952 | 0.0063 | 0.011  | -1.29 | 0.8575 | 0.00   | 0.002  |
| Organic acids            | Citrate                                    | HMDB0000094 | C00158 | 0.089  | 0.158   | 0.24  | 0.8585 | 0.9362 | 0.958  | -0.14 | 0.787 | 0.009  | 0.016  | 0.60  | 0.8977 | 0.1329 | 0.1481 |
| Organic acids            | Oxoglutaric acid                           | HMDB0000208 | C00026 | 0.089  | 0.15803 | 0.27  | 0.8682 | 0.936  | 0.9584 | -0.11 | 0.786 | 0.0063 | 0.011  | 0.62  | 0.9258 | 0.11   | 0.124  |
| Organic acids            | Pipecolate                                 | HMDB0000716 | C00408 | 0.046  | 0.091   | 0.46  | 0.8223 | 0.218  | 0.304  | -0.30 | 0.529 | 0.0022 | 0.004  | 0.55  | 0.9869 | 0.0014 | 0.0023 |
| Organic acids            | Alanyltyrosine                             | HMDB0028699 | -      | 0.1348 | 0.21643 | -0.58 | 0.1538 | 0.005  | 0.0138 | -2.44 | 1.024 | <0.001 | <0.001 | -2.06 | 1.1496 | <0.001 | 0.0016 |
| Organic acids            | Acetoacetate                               | HMDB0000060 | C00164 | 0.036  | 0.077   | 0.15  | 0.8947 | 0.1278 | 0.196  | -0.12 | 0.718 | <0.001 | <0.001 | 0.31  | 1.2648 | <0.001 | <0.001 |
| Organic acids            | 3-ureidopropionic acid                     | HMDB0000026 | C02642 | 0.7674 | 0.79989 | 0.004 | 0.2378 | 0.611  | 0.7068 | 0.104 | 0.37  | <0.001 | <0.001 | 0.76  | 1.4771 | <0.001 | <0.001 |
| Organic acids            | L-(+)-lactic acid                          | HMDB0000190 | C00186 | 0.010  | 0.024   | 0.23  | 0.9414 | 0.0066 | 0.016  | 0.38  | 1.273 | <0.001 | <0.001 | 0.94  | 1.4703 | <0.001 | <0.001 |
| Organic acids            | Taurine                                    | HMDB0000251 | C00245 | 0.0901 | 0.15875 | -0.48 | 0.7193 | 0.902  | 0.9475 | 0.036 | 0.162 | <0.001 | <0.001 | 1.87  | 1.4882 | <0.001 | <0.001 |
| Organic acids            | 3-indoxyl sulphate                         | HMDB0000682 | -      | 0.009  | 0.024   | -0.70 | 1.211  | 0.2051 | 0.289  | -0.54 | 0.24  | 0.0737 | 0.109  | -0.44 | 0.4108 | 0.0794 | 0.0939 |
| Organic acids            | Oxalic acid                                | HMDB0002329 | C00209 | 0.6258 | 0.70196 | 0.025 | 0.213  | 0.005  | 0.0138 | -0.28 | 1.175 | 0.1778 | 0.249  | 0.07  | 0.4808 | 0.00   | 0.0035 |
| Organic acids            | 2-oxobutyric acid                          | HMDB0000005 | C00109 | 0.016  | 0.038   | 0.48  | 0.9308 | 0.0114 | 0.025  | -0.51 | 0.752 | 0.233  | 0.316  | -0.17 | 0.4368 | <0.001 | <0.001 |
| Organic acids            | Pyruvic acid                               | HMDB0000243 | C00022 | 0.1827 | 0.26736 | 0.262 | 0.5671 | 0.101  | 0.1616 | -0.36 | 0.694 | 0.5957 | 0.667  | 0.08  | 0.2039 | 0.03   | 0.0365 |
| Organic acids            | Levulinic acid                             | HMDB0000720 | -      | 0.627  | 0.702   | 0.09  | 0.2947 | 0.0538 | 0.095  | -0.43 | 0.879 | 0.6699 | 0.729  | 0.07  | 0.1994 | 0.0552 | 0.0682 |
| Organic acids            | 6-hydroxycaproic acid                      | HMDB0012843 | C06103 | 0.2754 | 0.36918 | -0.12 | 0.495  | 0.347  | 0.44   | 0.147 | 0.777 | 0.6716 | 0.729  | 0.03  | 0.1389 | 0.23   | 0.2478 |
| Organonitrogen compounds | Choline                                    | HMDB0000097 | C00114 | <0.001 | <0.001  | 0.63  | 1.8628 | <0.001 | <0.001 | 1.02  | 1.94  | <0.001 | <0.001 | 0.79  | 1.735  | <0.001 | <0.001 |
| Organonitrogen compounds | D-sphingosine                              | HMDB0000252 | C00319 | <0.001 | <0.001  | 1.846 | 1.5341 | <0.001 | <0.001 | 2.113 | 1.647 | <0.001 | <0.001 | 2.24  | 1.516  | <0.001 | <0.001 |
| Organonitrogen compounds | Spermidine                                 | HMDB0001257 | C00315 | 0.006  | 0.019   | 1.36  | 1.1196 | <0.001 | <0.001 | 2.65  | 1.185 | <0.001 | <0.001 | 3.14  | 1.3326 | <0.001 | <0.001 |
| Organonitrogen compounds | Acetylcholine                              | HMDB0000895 | C01996 | 0.7674 | 0.79989 | 0.053 | 0.287  | 0.011  | 0.0254 | -0.52 | 1.035 | 0.73   | 0.776  | 0.03  | 0.2396 | 0.03   | 0.037  |
| Organooxygen compounds   | Pantothenic acid                           | HMDB0000210 | C00864 | 0.020  | 0.046   | 0.52  | 0.9206 | <0.001 | <0.001 | 1.68  | 1.225 | 0.0159 | 0.027  | -0.50 | 0.0008 | <0.001 | <0.001 |
| Organooxygen compounds   | Diacetyl                                   | HMDB0003407 | C00741 | 0.0084 | 0.02288 | -0.51 | 0.9885 | 0.437  | 0.5373 | 1.438 | 1.092 | 0.0522 | 0.080  | -0.23 | 0.5616 | 0.00   | 0.0054 |
| Others                   | 4-oxoproline                               | -           | C01877 | 0.008  | 0.023   | 1.14  | 1.355  | 0.2051 | 0.289  | -0.18 | 0.582 | 0.0063 | 0.011  | -0.46 | 0.4335 | <0.001 | <0.001 |
| Others                   | N-oleoyl dopamine                          | -           | C12272 | <0.001 | <0.001  | -1.81 | 2.0595 | 0.005  | 0.0122 | -2.71 | 0.263 | <0.001 | <0.001 | -2.69 | 1.9338 | <0.001 | <0.001 |
| Others                   | 4-hydroxy-l-phenylglycine                  | -           | C12323 | <0.001 | <0.001  | 0.93  | 1.4212 | <0.001 | <0.001 | 1.38  | 1.279 | <0.001 | <0.001 | 0.87  | 1.0854 | <0.001 | <0.001 |
| Others                   | 11,12-epoxy-(5z,8z,11z)-icosatrienoic acid | -           | C14770 | <0.001 | <0.001  | -3.27 | 1.0576 | <0.001 | <0.001 | 2.905 | 1.659 | <0.001 | <0.001 | 2.65  | 1.2377 | <0.001 | <0.001 |
| Others                   | 2-phenylpropanoic acid                     | HMDB0030524 | C14437 | <0.001 | <0.001  | -0.49 | 1.6841 | 0.0135 | 0.029  | -0.59 | 1.39  | <0.001 | <0.001 | 3.83  | 1.2863 | <0.001 | <0.001 |
| Phenylpropanoic acids    | DL-4-hydroxyphenyllactic acid              | HMDB0000755 | C03672 | 0.9843 | 0.98427 | -0.17 | 0.0125 | 0.583  | 0.6803 | 0.163 | 0.323 | 0.0553 | 0.084  | 0.40  | 0.6595 | 0.17   | 0.1885 |
| Phenylpropanoic acids    | 3-phenyllactic acid                        | HMDB0000748 | C05607 | 0.062  | 0.118   | 0.60  | 0.7215 | 0.2051 | 0.289  | 0.49  | 0.921 | 0.3919 | 0.477  | 0.22  | 0.3841 | 0.2892 | 0.304  |
| Phospholipids            | 2-amino-1,3,4-octadecanetriol              | HMDB0004610 | C12144 | <0.001 | <0.001  | -2.15 | 2.1547 | <0.001 | <0.001 | -2.53 | 2.019 | <0.001 | <0.001 | -2.90 | 1.8376 | <0.001 | <0.001 |
| Purines                  | 1-methylxanthine                           | HMDB0010738 | C16358 | 0.859  | 0.880   | -0.39 | 0.4509 | 0.0135 | 0.029  | -2.52 | 0.207 | 0.0029 | 0.006  | -2.01 | 0.5731 | <0.001 | <0.001 |

|                            |                         |             |        |        |         |       |        |        |        |       |       |        |        |       |        |        |        |
|----------------------------|-------------------------|-------------|--------|--------|---------|-------|--------|--------|--------|-------|-------|--------|--------|-------|--------|--------|--------|
| Purines                    | 1,3-dimethyluric acid   | HMDB0001857 | -      | 0.2581 | 0.35161 | -1.58 | 0.2478 | 0.077  | 0.1308 | -4.55 | 0.552 | 0.0033 | 0.006  | -4.46 | 0.7327 | 0.02   | 0.023  |
| Purines                    | Guanine                 | HMDB0000132 | C00242 | <0.001 | <0.001  | -2.37 | 1.6194 | <0.001 | 0.002  | -2.73 | 0.489 | <0.001 | <0.001 | -2.11 | 1.235  | <0.001 | <0.001 |
| Purines                    | Adenine                 | HMDB0000034 | C00147 | 0.0147 | 0.03644 | -0.27 | 1.0969 | 0.098  | 0.1577 | -0.38 | 0.509 | <0.001 | <0.001 | -1.05 | 1.6859 | <0.001 | <0.001 |
| Purines                    | Xanthine                | HMDB0000292 | C00385 | 0.069  | 0.129   | 0.49  | 0.7945 | 0.0273 | 0.053  | 0.68  | 1.134 | <0.001 | <0.001 | 1.65  | 1.5564 | <0.001 | <0.001 |
| Purines                    | Hypoxanthine            | HMDB0000157 | C00262 | 0.1963 | 0.28269 | 0.35  | 0.7281 | <0.001 | <0.001 | 1.541 | 1.521 | <0.001 | <0.001 | 2.13  | 1.8049 | <0.001 | <0.001 |
| Purines                    | 7-methylxanthine        | HMDB0001991 | C16353 | 0.489  | 0.596   | -1.73 | 0.0221 | 0.0768 | 0.131  | -3.72 | 0.442 | 0.0435 | 0.068  | -3.04 | 0.0538 | 0.0062 | 0.0089 |
| Purines                    | 7-methylguanine         | HMDB0000897 | C02242 | 0.9843 | 0.98427 | 0.02  | 0.0777 | 0.019  | 0.0388 | 0.462 | 0.847 | 0.2497 | 0.331  | 0.24  | 0.5149 | 0.10   | 0.1123 |
| Purines                    | 1-methyluric acid       | HMDB0003099 | C16359 | 0.258  | 0.352   | -0.17 | 0.4852 | 0.2701 | 0.356  | 1.07  | 0.628 | 0.4555 | 0.534  | -0.26 | 0.4341 | 0.1069 | 0.1214 |
| Purines                    | Uric acid               | HMDB0000289 | C00366 | <0.001 | 0.00125 | -0.55 | 1.4295 | <0.001 | 0.0034 | -0.89 | 1.408 | 0.8771 | 0.902  | 0.02  | 0.0026 | <0.001 | <0.001 |
| Pyridines                  | 3-hydroxypicolinic acid | HMDB0013188 | C18620 | <0.001 | <0.001  | -1.00 | 0.3146 | 0.994  | 0.998  | 0.00  | 0.045 | <0.001 | <0.001 | -1.09 | 1.7924 | <0.001 | <0.001 |
| Pyridines                  | Pyridoxamine            | HMDB0001431 | C00534 | 0.5404 | 0.63935 | -0.01 | 0.2831 | 0.689  | 0.7816 | 0.18  | 0.186 | <0.001 | <0.001 | 1.58  | 1.3447 | <0.001 | <0.001 |
| Pyridines                  | Nicotinamide            | HMDB0001406 | C00153 | 0.038  | 0.078   | 0.90  | 0.9976 | <0.001 | <0.001 | 1.96  | 1.75  | <0.001 | <0.001 | 2.48  | 1.6519 | <0.001 | <0.001 |
| Pyridines                  | Pyridoxal               | HMDB0001545 | C00250 | 0.0108 | 0.0272  | 0.733 | 0.5748 | 0.581  | 0.6803 | -0.1  | 0.281 | 0.094  | 0.137  | 0.20  | 0.5012 | 0.00   | 0.0047 |
| Pyridines                  | 6-methylnicotinamide    | HMDB0013704 | -      | 0.322  | 0.427   | -0.13 | 0.3975 | 0.4288 | 0.535  | 0.08  | 0.347 | 0.4555 | 0.534  | 0.02  | 0.295  | 0.3168 | 0.3299 |
| Pyridines                  | 4-pyridoxic acid        | HMDB0000017 | C00847 | 0.5486 | 0.64607 | 0.145 | 0.2229 | <0.001 | <0.001 | 2.655 | 1.208 | 0.9566 | 0.960  | -0.19 | 0.3254 | <0.001 | <0.001 |
| Pyridines                  | Cotinine                | HMDB0001046 | -      | <0.001 | <0.001  | -0.52 | 1.3511 | <0.001 | <0.001 | -1.10 | 1.66  | <0.001 | 0.002  | -0.56 | 1.1065 | <0.001 | <0.001 |
| Pyrimidines                | Dihydrothymine          | HMDB0000079 | C00906 | 0.0032 | 0.01018 | -0.51 | 0.7256 | 0.046  | 0.0829 | -0.45 | 0.62  | <0.001 | <0.001 | 0.66  | 1.0555 | <0.001 | <0.001 |
| Pyrimidines                | Thymine                 | HMDB0000262 | C00178 | 0.004  | 0.011   | -0.40 | 1.1869 | 0.0188 | 0.039  | -0.35 | 1.009 | 0.2653 | 0.346  | 0.19  | 0.5139 | <0.001 | <0.001 |
| Pyrrolines                 | Bilirubin               | HMDB0000054 | C00486 | 0.0095 | 0.02444 | -0.37 | 0.9187 | 0.016  | 0.0341 | -0.96 | 0.71  | 0.1702 | 0.240  | 0.27  | 0.5101 | <0.001 | <0.001 |
| Quinolines and derivatives | Kynurenic acid          | HMDB0000715 | C01717 | 0.708  | 0.756   | 0.20  | 0.0612 | 0.0096 | 0.023  | 0.74  | 1.12  | 0.8417 | 0.873  | 0.09  | 0.1905 | 0.0115 | 0.0158 |
| Tetrahydroisoquinolines    | Salsolinol              | HMDB0042012 | C09642 | <0.001 | <0.001  | 3.624 | 2.1251 | <0.001 | <0.001 | 4.464 | 1.977 | <0.001 | <0.001 | 2.69  | 1.742  | <0.001 | <0.001 |

**Table S3. Metabolites quantified in the discovery cohort by targeted metabolomics (related to figure S3)**

| Class                 | Name                        | HMDB_ID  | KEGG_ID | Cluster number | Normal VS Mild |         |        |        | Normal VS Severe |        |        |       | Normal VS Recovery |        |        |        | Total  |             |
|-----------------------|-----------------------------|----------|---------|----------------|----------------|---------|--------|--------|------------------|--------|--------|-------|--------------------|--------|--------|--------|--------|-------------|
|                       |                             |          |         |                | P              | FDR     | log2FC | VIP    | P                | FDR    | log2FC | VIP   | P                  | FDR    | log2FC | VIP    | P      | FDR         |
| Amino Acids           | Lysine                      | HMDB0000 | C00047  | 2              | 0.9992         | 1       | 0      | 0.1996 | 0.655            | 0.7759 | 0.085  | 0.213 | 0.5208             | 0.8034 | 0.011  | 0.51   | 0.8406 | 0.862297531 |
| Amino Acids           | Histidine                   | 0177     | C00135  | 13             | 0.3844         | 0.59691 | -0.17  | 0.4865 | 0.3529           | 0.498  | -0.17  | 0.585 | 0.5595             | 0.813  | 0.083  | 0.3946 | 0.3009 | 0.396500222 |
| Amino Acids           | Arginine                    | HMDB0000 | C00062  | 6              | 0.9143         | 0.94804 | 0.016  | 0.0469 | 0.0019           | 0.0113 | -0.48  | 1.643 | 0.0089             | 0.0603 | -0.37  | 1.3098 | 0.0025 | 0.009752072 |
| Amino Acids           | Ornithine                   | HMDB000  | C00077  | 4              | 0.0311         | 0.18193 | 0.371  | 1.5216 | <0.001           | 0.0035 | 0.981  | 1.794 | <0.001             | <0.001 | 1.557  | 2.3139 | 9E-08  | <0.001      |
| Amino Acids           | Glutamine                   | HMDB0000 | C00064  | 8              | 0.0373         | 0.18541 | -0.36  | 1.4032 | 0.0019           | 0.0113 | -0.62  | 1.791 | 0.0043             | 0.0346 | -0.48  | 1.8552 | 0.0019 | 0.008166109 |
| Amino Acids           | Glutamic acid               | HMDB000  | C00025  | 2              | <0.001         | 0.00256 | 0.82   | 1.8495 | <0.001           | <0.001 | 1.482  | 2.015 | <0.001             | <0.001 | 1.454  | 2.6133 | 3E-07  | <0.001      |
| Amino Acids           | beta-Alanine                | HMDB0000 | C00099  | 1              | 0.8807         | 0.92245 | -0.01  | 0.3399 | 0.0439           | 0.1105 | 0.544  | 1.32  | 0.0311             | 0.157  | 0.128  | 0.8346 | 0.0063 | 0.020427551 |
| Amino Acids           | Alanine                     | 0161     | C00041  | 14             | 0.9472         | 0.97157 | -0.04  | 0.2593 | 0.7221           | 0.8312 | -0.06  | 0.256 | 0.2497             | 0.5287 | 0.17   | 0.7592 | 0.7447 | 0.779998678 |
| Amino Acids           | Dimethylglycine             | HMDB0000 | C01026  | 3              | 0.007          | 0.077   | 0.643  | 1.2967 | 0.007            | 0.0273 | 0.508  | 1.14  | 0.1115             | 0.2883 | 0.303  | 0.7737 | 0.0262 | 0.061379059 |
| Amino Acids           | GABA                        | 0112     | C00334  | 5              | <0.001         | 0.01124 | -0.59  | 2.402  | 0.0188           | 0.0594 | -0.53  | 1.12  | 0.0094             | 0.0603 | -0.39  | 1.6741 | 0.0018 | 0.008130636 |
| Amino Acids           | Serine                      | HMDB0000 | C00065  | 14             | 0.2662         | 0.52973 | 0.168  | 0.6391 | 0.6796           | 0.7982 | -0.08  | 0.224 | 0.0922             | 0.2883 | 0.153  | 1.0318 | 0.0932 | 0.162657087 |
| Amino Acids           | Threonine                   | 0167     | C00188  | 13             | 0.0506         | 0.22879 | -0.5   | 1.3725 | 0.3944           | 0.5489 | -0.2   | 0.493 | 0.6746             | 0.8462 | 0.08   | 0.4134 | 0.0312 | 0.06974413  |
| Amino Acids           | Homoserine                  | HMDB0000 | C00263  | 13             | 0.0164         | 0.12118 | -0.8   | 1.5409 | 0.3513           | 0.498  | -0.19  | 0.531 | 0.7181             | 0.8621 | -0.06  | 0.0236 | 0.0516 | 0.109342478 |
| Amino Acids           | Creatine                    | 0064     | C00300  | 16             | 0.2917         | 0.5432  | 0.341  | 0.6911 | 0.0036           | 0.0165 | 1.969  | 1.569 | 0.2758             | 0.5435 | -0.26  | 0.5015 | 0.0002 | 0.001896725 |
| Carbohydrates         | Threonic acid               | HMDB0000 | C01620  | 3              | 0.5801         | 0.72152 | 0.129  | 0.545  | 0.2852           | 0.4368 | 0.22   | 0.678 | 0.4604             | 0.7545 | 0.188  | 0.2305 | 0.9099 | 0.914540271 |
| Organic Acids         | Hydroxypropionic acid       | HMDB0000 | C01013  | 12             | 0.8771         | 0.92245 | -0.13  | 0.1221 | 0.0156           | 0.0509 | 0.484  | 0.877 | 0.4369             | 0.7322 | -0.12  | 0.5262 | 0.0089 | 0.026848137 |
| Amino Acids           | Homocitrulline              | HMDB0000 | C02427  | 12             | 0.3175         | 0.54459 | -0.16  | 1.1381 | 0.0036           | 0.0165 | 1.153  | 1.487 | 0.7739             | 0.8902 | 0.164  | 0.4166 | 0.0004 | 0.002455499 |
| Organic Acids         | Lactic acid                 | HMDB000  | C00186  | 2              | 0.4647         | 0.64663 | 0.105  | 0.5539 | <0.001           | <0.001 | 1.238  | 2.229 | <0.001             | <0.001 | 1.158  | 2.7261 | 3E-08  | <0.001      |
| Organic Acids         | Nicotinic acid              | HMDB0001 | C00253  | 9              | 0.3352         | 0.5559  | 0.002  | 1.0209 | 0.9221           | 0.9607 | 0      | 0.48  | 0.8321             | 0.9261 | 0      | 0.5128 | 0.5303 | 0.631915816 |
| Amino Acids           | Methylcysteine              | 2108     | -       | 14             | 0.1546         | 0.38936 | 0.392  | 1.0025 | 0.347            | 0.4968 | -0.82  | 0.399 | 0.1626             | 0.3763 | 0.308  | 0.825  | 0.1563 | 0.246843247 |
| Benzoic acids         | m-                          | HMDB0001 | -       | 11             | 0.0922         | 0.29123 | -0.13  | 0.7543 | 0.8886           | 0.9357 | 0.01   | 0.033 | 0.8639             | 0.9384 | 0.009  | 0.1152 | 0.1743 | 0.26429579  |
| Amino Acids           | 2-Phenylglycine             | 2210     | -       | 2              | 0.0756         | 0.26378 | 0.087  | 0.8204 | <0.001           | 0.003  | 0.456  | 1.398 | 0.0311             | 0.157  | 0.083  | 0.5041 | 0.0012 | 0.006010721 |
| Amino Acids           | Tyrosine                    | HMDB0000 | C00082  | 9              | 0.5501         | 0.70505 | 0.029  | 0.3511 | 0.6819           | 0.7982 | 0.066  | 0.302 | 0.412              | 0.7067 | -0.27  | 0.3591 | 0.8629 | 0.880599077 |
| Phenylpropanoid       | Dihydroxyhydrocinnamic acid | HMDB0000 | C10447  | 2              | 0.3175         | 0.54459 | -0.5   | 0.2193 | <0.001           | 0.0019 | 1.653  | 1.775 | <0.001             | <0.001 | 2.003  | 2.5133 | 1E-06  | <0.001      |
| Amino Acids           | Asparagine                  | HMDB0000 | C00152  | 4              | 0.0108         | 0.09813 | -0.34  | 1.2909 | 0.8328           | 0.891  | 0.075  | 0.333 | 0.0094             | 0.0603 | 0.199  | 1.3742 | 0.0001 | 0.001460997 |
| Benzoic acids         | Protocatechuic acid         | HMDB0000 | C00230  | 9              | 0.4581         | 0.64653 | -0.05  | 0.2115 | 0.4601           | 0.6063 | 0.238  | 0.153 | 0.3227             | 0.5891 | -0.07  | 0.9878 | 0.1559 | 0.246843247 |
| Phenylpropanoic Acids | Hydroxyphenyllactic acid    | HMDB0000 | C03672  | 16             | 0.3622         | 0.58704 | 0.113  | 0.4488 | 0.1693           | 0.3149 | 0.116  | 0.98  | 0.8424             | 0.9261 | -0.05  | 0.1466 | 0.624  | 0.682266767 |
| Amino Acids           | Kynurenine                  | 0684     | C00328  | 16             | 0.0358         | 0.18259 | 0.426  | 1.133  | 0.0036           | 0.0165 | 1.05   | 1.398 | 0.9472             | 0.9666 | -0.03  | 0.3139 | 0.0055 | 0.018589645 |
| Amino Acids           | Aspartic acid               | HMDB0000 | C00049  | 3              | <0.001         | 0.00192 | 1.403  | 2.4534 | <0.001           | 0.0035 | 1.162  | 1.623 | <0.001             | <0.001 | 1.122  | 2.2054 | 0.0001 | 0.001335961 |
| Amino Acids           | Amino adipic acid           | HMDB0000 | C00956  | 3              | 0.1834         | 0.43026 | 0.296  | 0.6988 | 0.2776           | 0.4316 | 0.35   | 0.729 | 0.4292             | 0.7299 | 0.195  | 0.4944 | 0.5817 | 0.667115721 |
| Carbohydrates         | Glucaric acid               | HMDB0000 | C00818  | 12             | 0.486          | 0.65341 | -0.22  | 0.4936 | 0.0908           | 0.2009 | 0.769  | 1.123 | 0.8771             | 0.9384 | 5E-04  | 0.31   | 0.0643 | 0.123058223 |



|                       |                                     |              |        |    |        |         |       |        |        |        |       |       |        |        |       |        |        |             |
|-----------------------|-------------------------------------|--------------|--------|----|--------|---------|-------|--------|--------|--------|-------|-------|--------|--------|-------|--------|--------|-------------|
| Fatty Acids           | 2-Hydroxy-3-methylbutyric           | HMDB0000407  | -      | 4  | 0.9821 | 0.99235 | -0.01 | 0.0716 | 0.9508 | 0.9766 | 0.07  | 0.042 | 0.132  | 0.3164 | 0.888 | 0.7095 | 0.3659 | 0.460850622 |
| Pyridines             | Picolinic acid ortho-Hydroxyphenyla | HMDB00002    | C10164 | 16 | 0.4379 | 0.63142 | 0.226 | 0.6754 | 0.0374 | 0.0993 | 0.93  | 0.933 | 0.3175 | 0.5891 | 0.256 | 0.947  | 0.1662 | 0.258444795 |
| Benzenoids            | cetic acid                          | HMDB0000669  | C05852 | 12 | 0.588  | 0.72678 | -0.02 | 0.3463 | <0.001 | 0.0037 | 1.614 | 1.344 | 0.6888 | 0.8462 | -0.04 | 0.3361 | 4E-05  | <0.001      |
| Amino Acids           | Hippuric acid                       | HMDB00000    | C01586 | 12 | 0.0188 | 0.12455 | -2.53 | 1.3265 | 0.7859 | 0.8547 | -0.82 | 0.498 | 0.0836 | 0.2867 | -1.52 | 1.4563 | 0.0605 | 0.118118137 |
| Organic Acids         | Malic acid                          | HMDB0000156  | C00149 | 1  | 0.4258 | 0.63142 | 0.163 | 0.3095 | <0.001 | 0.0037 | 0.711 | 1.387 | <0.001 | 0.0066 | 0.765 | 1.6304 | 7E-05  | 0.001022042 |
| Amino Acids           | N-Acetyaspartic                     | HMDB00000    | C01042 | 12 | 0.275  | 0.53291 | -0.56 | 0.9152 | 0.0438 | 0.1105 | 0.917 | 0.922 | 0.6832 | 0.8462 | 0.179 | 0.0024 | 0.0026 | 0.010231941 |
| SCFAs                 | Ethylmethylacet                     | HMDB00002176 | C18319 | 14 | 0.0551 | 0.23247 | 0.496 | 1.1753 | 0.5095 | 0.6418 | 0.302 | 0.28  | 0.0442 | 0.2043 | 0.56  | 1.2436 | 0.0864 | 0.154840858 |
| Benzenoids            | Phenylacetic                        | HMDB00000    | C07086 | 1  | 0.2085 | 0.45106 | 0.5   | 0.8852 | 0.5254 | 0.6576 | 0.311 | 0.479 | 0.4379 | 0.7322 | -0.58 | 0.4238 | 0.697  | 0.737827049 |
| Indoles               | Indole-3-                           | HMDB00000    | C19837 | 8  | 0.0536 | 0.23247 | -0.49 | 1.2611 | 0.2069 | 0.3613 | -0.49 | 0.721 | 0.049  | 0.2166 | -0.5  | 1.0488 | 0.1221 | 0.204112785 |
| Indoles               | Indoleacetic                        | HMDB00000    | C00954 | 11 | 0.0081 | 0.08483 | -0.9  | 1.2431 | 0.7859 | 0.8547 | 0.111 | 0.248 | 0.6423 | 0.83   | 0.007 | 0.3086 | 0.0168 | 0.042779448 |
| Organic Acids         | Fumaric acid                        | HMDB0000134  | C00122 | 11 | 0.0108 | 0.09813 | -0.77 | 1.9912 | 0.171  | 0.3151 | 0.461 | 0.744 | 0.55   | 0.8109 | 0.149 | 0.1311 | 0.0004 | 0.002455499 |
| Organic Acids         | Glutaric acid                       | HMDB00000    | C00489 | 12 | 0.1593 | 0.39621 | -0.77 | 0.6319 | 0.7859 | 0.8547 | -0.01 | 0.544 | 0.0614 | 0.2304 | -0.8  | 0.004  | 0.1678 | 0.258882255 |
| Organic Acids         | Aconitic acid                       | HMDB0000958  | C02341 | 12 | 0.1643 | 0.39943 | -0.27 | 0.7983 | 0.6505 | 0.7752 | -0.3  | 0.668 | 0.8594 | 0.9384 | -0.03 | 0.3304 | 0.61   | 0.678205771 |
| Phenylpropanoids      | Cinnamic acid                       | HMDB00000    | C10438 | 16 | 0.5733 | 0.72152 | 0.057 | 0.6623 | 0.0525 | 0.1274 | 0.314 | 1.308 | 0.7696 | 0.8902 | 0.082 | 0.1137 | 0.0886 | 0.157384982 |
| Phenylpropanoic Acids | 2-Phenylpropiona                    | HMDB0001743  | -      | 15 | 0.6744 | 0.78943 | -0.17 | 0.2313 | 0.0086 | 0.0324 | -0.91 | 0.246 | 0.1015 | 0.2883 | -0.45 | 0.8772 | 0.0441 | 0.096395696 |
| Phenylpropanoic Acids | Hydrocinnamic                       | HMDB00000    | C05629 | 15 | 0.707  | 0.79211 | 0.368 | 0.4902 | 0.4134 | 0.5531 | -0.6  | 0.256 | 0.1105 | 0.2883 | -0.53 | 1.0868 | 0.0788 | 0.147983398 |
| Indoles               | 3-Indolepropionic                   | HMDB0002302  | -      | 7  | 0.0686 | 0.26242 | -1.1  | 0.9673 | 0.007  | 0.0273 | -2.06 | 0.116 | 0.2204 | 0.482  | -0.76 | 1.0969 | 0.0814 | 0.148643527 |
| Organic Acids         | Azelaic acid                        | HMDB00000    | C08261 | 12 | 0.0043 | 0.06646 | 1.061 | 1.3719 | <0.001 | 0.0026 | 4.285 | 1.413 | 0.1223 | 0.3005 | 0.604 | 1.0539 | 0.0004 | 0.002455499 |
| Fatty Acids           | Sebacic acid                        | HMDB0000792  | C08277 | 12 | 0.0756 | 0.26378 | 0.421 | 1.2193 | <0.001 | 0.0037 | 2.926 | 0.773 | 0.0013 | 0.013  | 0.688 | 1.4755 | 0.0001 | 0.001460997 |
| Organic Acids         | alpha-Ketoisovaleric                | HMDB00000    | C00141 | 12 | 0.4855 | 0.65341 | 0.116 | 0.8576 | 0.0028 | 0.0144 | 1.792 | 1.206 | 0.9459 | 0.9666 | -0.17 | 0.5712 | 0.0044 | 0.016156797 |
| Organic Acids         | Ketoleucine                         | HMDB0000695  | C00233 | 8  | 0.3152 | 0.54459 | -0.17 | 0.3886 | 0.1507 | 0.2856 | -0.45 | 0.469 | 0.088  | 0.2883 | -0.25 | 0.924  | 0.62   | 0.681611159 |
| Organic Acids         | 3-Methy2-oxo                        | HMDB00000    | C03465 | 5  | 0.0546 | 0.23247 | -0.38 | 0.9724 | 0.0982 | 0.2148 | -0.4  | 0.943 | 0.1015 | 0.2883 | -0.42 | 0.8101 | 0.1734 | 0.26429579  |
| Benzenoids            | Phenylpyruvic                       | HMDB0000205  | C00166 | 10 | 0.0614 | 0.24425 | 0.62  | 1.3036 | 0.0136 | 0.0459 | 0.572 | 1.38  | 0.6678 | 0.8462 | -0.07 | 0.3372 | 0.0087 | 0.026675754 |
| Fatty Acids           | Methylmalonic                       | HMDB00000    | C02170 | 11 | 0.1004 | 0.30609 | -0.32 | 1.1855 | 0.6075 | 0.7372 | 0.051 | 0.426 | 0.9824 | 0.9873 | 0.033 | 0.1772 | 0.0812 | 0.148643527 |
| Amino Acids           | 2-Hydroxyglutaric                   | HMDB0000606  | C01087 | 1  | 0.1223 | 0.3428  | 0.449 | 0.3595 | 0.0022 | 0.0114 | 0.98  | 1.403 | 0.0094 | 0.0603 | 0.863 | 1.3835 | 0.0013 | 0.00612856  |
| Amino Acids           | Glycine                             | HMDB00000    | C00037 | 14 | 0.1223 | 0.3428  | 0.372 | 1.0326 | 0.4141 | 0.5531 | 0.132 | 0.507 | 0.0186 | 0.1086 | 0.298 | 1.1063 | 0.105  | 0.181412743 |
| Organic Acids         | Guanidoacetic                       | HMDB0000128  | C00581 | 8  | 0.0015 | 0.03043 | -0.75 | 1.742  | <0.001 | 0.0037 | -0.67 | 1.629 | 0.0013 | 0.013  | -0.79 | 1.9507 | 0.0022 | 0.009123449 |
| Amino Acids           | Citrulline                          | HMDB00000    | C00327 | 13 | 0.0067 | 0.077   | -0.59 | 1.7025 | 0.0233 | 0.0672 | -0.49 | 1.342 | 0.2564 | 0.5316 | -0.28 | 0.3809 | 0.026  | 0.061379059 |
| Carbohydrates         | Galactonic acid                     | HMDB0000565  | C00880 | 4  | 0.2733 | 0.53291 | 0     | 0.5973 | 1      | 1      | 0     | 0.203 | 0.5398 | 0.8109 | 0.017 | 0.914  | 0.3973 | 0.492960325 |
| Carbohydrates         | Gluconolactone                      | HMDB00000    | C00198 | 12 | 0.0125 | 0.10419 | 0.269 | 1.2912 | <0.001 | 0.0018 | 0.935 | 0.846 | 0.007  | 0.0533 | 0.138 | 1.1524 | 0.0001 | 0.001248639 |

|               |                 |           |        |    |        |         |       |        |        |        |       |       |        |        |       |        |        |             |  |
|---------------|-----------------|-----------|--------|----|--------|---------|-------|--------|--------|--------|-------|-------|--------|--------|-------|--------|--------|-------------|--|
|               |                 | HMDB000   |        |    |        |         |       |        |        |        |       |       |        |        |       |        |        |             |  |
| Organic Acids | Glycolic acid   | 0115      | C00160 | 9  | 0.5321 | 0.69793 | 0.102 | 0.4281 | 0.7345 | 0.8319 | -0.06 | 0.401 | 0.3114 | 0.5891 | -0.17 | 0.9779 | 0.2111 | 0.297870491 |  |
| Amino Acids   | alpha-          | HMDB00000 | C02356 | 14 | 0.5208 | 0.69093 | -0.04 | 0.4167 | 0.1037 | 0.2219 | -0.42 | 1.033 | 0.2564 | 0.5316 | -0.13 | 0.2412 | 0.0649 | 0.123058223 |  |
|               |                 | HMDB000   |        |    |        |         |       |        |        |        |       |       |        |        |       |        |        |             |  |
| Carbohydrates | Glyceric acid   | 0139      | C00258 | 3  | 0.0015 | 0.03043 | 0.784 | 2.0707 | <0.001 | <0.001 | 0.886 | 2.061 | <0.001 | <0.001 | 0.786 | 2.1064 | 0.0004 | 0.002455499 |  |
| Amino Acids   | Proline         | HMDB00000 | C00148 | 4  | 0.0349 | 0.18259 | -0.35 | 1.3856 | 0.7825 | 0.8547 | -0.05 | 0.285 | 0.0527 | 0.2194 | 0.318 | 1.084  | 0.0016 | 0.007348811 |  |
|               |                 | HMDB000   |        |    |        |         |       |        |        |        |       |       |        |        |       |        |        |             |  |
| Amino Acids   | N-Acetylglycine | 0532      | -      | 16 | 0.2204 | 0.46666 | 0.171 | 0.8397 | 0.2115 | 0.3628 | 0.196 | 0.986 | 0.6109 | 0.8214 | -0.09 | 0.1057 | 0.1552 | 0.246843247 |  |
| Amino Acids   | Pipecolic acid  | HMDB00000 | C00408 | 15 | 0.7402 | 0.81835 | 0.027 | 0.5135 | 0.0512 | 0.1258 | 0.326 | 1.352 | 0.1015 | 0.2883 | -0.37 | 0.6057 | 0.015  | 0.039769314 |  |
|               |                 | HMDB000   |        |    |        |         |       |        |        |        |       |       |        |        |       |        |        |             |  |
| Organic Acids | Erythronic acid | 0613      | -      | 3  | 0.2564 | 0.51545 | 0.223 | 0.8471 | 0.4042 | 0.5531 | 0.095 | 0.469 | 0.8771 | 0.9384 | -0.08 | 0.1394 | 0.6925 | 0.736906462 |  |
| Amino Acids   | N-Acetylserine  | HMDB00002 | -      | 1  | 0.3775 | 0.59691 | 0.043 | 0.6044 | <0.001 | 0.0037 | 0.386 | 1.621 | 0.0551 | 0.2194 | 0.071 | 0.7795 | 0.0009 | 0.004525869 |  |
|               |                 | HMDB000   |        |    |        |         |       |        |        |        |       |       |        |        |       |        |        |             |  |
| Organic Acids | Shikimic acid   | 3070      | C00493 | 1  | 0.4572 | 0.64653 | 0.006 | 1.062  | <0.001 | <0.001 | 0.03  | 1.443 | 0.6527 | 0.838  | 0.002 | 0.8312 | 0.0046 | 0.016483381 |  |
| Amino Acids   | N-              | HMDB00006 | -      | 11 | 0.3333 | 0.5559  | 0     | 0.8695 | 0.6005 | 0.7372 | 0.003 | 0.32  | 0.982  | 0.9873 | 8E-04 | 0.3624 | 0.5862 | 0.667115721 |  |
|               |                 | HMDB000   |        |    |        |         |       |        |        |        |       |       |        |        |       |        |        |             |  |
| Organic Acids | Quinic acid     | 3072      | C00296 | 11 | 0.6109 | 0.73675 | 0.002 | 0.9231 | 0.2953 | 0.4452 | 0.017 | 0.035 | 0.0504 | 0.2182 | 0.03  | 0.1009 | 0.1319 | 0.218740682 |  |
| Carbohydrates | N-              | HMDB00000 | C19910 | 12 | 0.0173 | 0.1231  | 0.185 | 1.2763 | <0.001 | <0.001 | 1.108 | 1.938 | <0.001 | 0.0026 | 0.339 | 1.5079 | 3E-07  | <0.001      |  |
|               |                 | HMDB000   |        |    |        |         |       |        |        |        |       |       |        |        |       |        |        |             |  |
| SCFAs         | Acetic acid     | 0042      | C00033 | 9  | 0.0756 | 0.26378 | 0.384 | 1.2805 | 0.7399 | 0.8319 | -0.13 | 0.288 | 0.1115 | 0.2883 | -0.41 | 0.9916 | 0.0056 | 0.018589645 |  |
| Amino Acids   | Valine          | HMDB00000 | C00183 | 12 | 0.558  | 0.70728 | -0.08 | 0.3557 | 0.9759 | 0.9809 | -0.05 | 0.312 | 0.7081 | 0.8592 | -0.04 | 0.3937 | 0.8852 | 0.898727628 |  |
| Amino Acids   | Pyroglutamic    | HMDB00000 | C01879 | 1  | <0.001 | 0.00156 | 1.01  | 2.1727 | <0.001 | <0.001 | 1.386 | 1.881 | <0.001 | <0.001 | 1.134 | 2.3065 | 6E-06  | <0.001      |  |
| Amino Acids   | 5-              | HMDB00001 | C00430 | 1  | 0.2758 | 0.53291 | 0.099 | 0.4984 | 0.0045 | 0.0203 | 0.383 | 1.413 | 0.0682 | 0.2467 | 0.239 | 0.8973 | 0.0135 | 0.037174896 |  |
|               |                 | HMDB000   |        |    |        |         |       |        |        |        |       |       |        |        |       |        |        |             |  |
| Carbohydrates | Glucose         | 0122      | C00221 | 9  | 0.035  | 0.18259 | 0.407 | 1.4496 | 0.6505 | 0.7752 | -0.07 | 0.282 | 0.001  | 0.0115 | -0.79 | 1.8431 | 8E-05  | 0.001022042 |  |
| Carbohydrates | Maltose/Lactos  | -         | -      | 12 | 0.1015 | 0.30609 | 0.675 | 1.235  | <0.001 | <0.001 | 2.31  | 0.511 | 0.0043 | 0.0346 | 1.303 | 1.9046 | 3E-06  | <0.001      |  |
|               |                 | HMDB000   |        |    |        |         |       |        |        |        |       |       |        |        |       |        |        |             |  |
| Carbohydrates | Maltotriose     | 1262      | C01835 | 1  | 0.2851 | 0.54041 | 0     | 0.4261 | 0.0032 | 0.0159 | 0.61  | 1.214 | 0.0281 | 0.1514 | 0.296 | 1.2114 | 8E-05  | 0.001022042 |  |
| Organic Acids | 3-              | HMDB00000 | C01089 | 9  | 0.3628 | 0.58704 | 0.019 | 0.9704 | 0.4134 | 0.5531 | -1.15 | 0.367 | 0.1223 | 0.3005 | -1.19 | 0.7464 | 0.0556 | 0.114158789 |  |
|               |                 | HMDB000   |        |    |        |         |       |        |        |        |       |       |        |        |       |        |        |             |  |
| Amino Acids   | Methionine      | 0696      | C00073 | 5  | 0.5527 | 0.70505 | -0.09 | 0.461  | 0.6333 | 0.7638 | -0.09 | 0.348 | 0.5208 | 0.8034 | -0.08 | 0.179  | 0.8363 | 0.862263386 |  |
| Benzoic acids | 4-              | HMDB00001 | D06890 | 10 | 0.4184 | 0.63082 | 0.015 | 1.0061 | 0.0575 | 0.1378 | 0.027 | 0.961 | 0.7191 | 0.8621 | 0.007 | 0.3967 | 0.3988 | 0.492960325 |  |
|               | alpha-          | HMDB000   |        |    |        |         |       |        |        |        |       |       |        |        |       |        |        |             |  |
| Organic Acids | Hydroxyisobutyr | 0729      | -      | 16 | 0.4005 | 0.61311 | 0.307 | 0.6835 | 0.0162 | 0.052  | 0.962 | 1.453 | 0.5879 | 0.8182 | 0.231 | 0.4005 | 0.0226 | 0.055453445 |  |
| Organic Acids | 2-              | HMDB00000 | C05984 | 10 | <0.001 | 0.00156 | 0.927 | 1.8588 | 0.0056 | 0.0243 | 0.836 | 1.476 | 0.0144 | 0.0866 | 0.496 | 1.1065 | 0.0002 | 0.001896725 |  |
| SCFAs         | 3-              | HMDB00000 | -      | 16 | 0.0108 | 0.09813 | 0.152 | 1.1381 | 0.0022 | 0.0114 | 0.412 | 1.481 | 0.8079 | 0.9084 | -0.08 | 0.119  | 0.0007 | 0.003514111 |  |
| Carbohydrates | Glutaconic acid | HMDB00000 | C02214 | 12 | 0.6573 | 0.7833  | -0.17 | 0.4907 | 0.0022 | 0.0114 | 0.656 | 1.181 | 0.1841 | 0.4117 | 0.439 | 0.679  | 0.0004 | 0.002455499 |  |
|               |                 | HMDB000   |        |    |        |         |       |        |        |        |       |       |        |        |       |        |        |             |  |
| Amino Acids   | Isoleucine      | 0172      | C00407 | 11 | 0.2921 | 0.5432  | -0.23 | 0.6572 | 0.6075 | 0.7372 | 0.04  | 0.415 | 0.3281 | 0.5936 | 0.174 | 0.4879 | 0.15   | 0.242747664 |  |
| Amino Acids   | Leucine         | HMDB00000 | C00123 | 1  | 0.2231 | 0.46728 | 0.219 | 0.7753 | 0.1896 | 0.3369 | 0.294 | 0.908 | 0.0909 | 0.2883 | 0.278 | 0.929  | 0.4235 | 0.520239055 |  |
|               |                 | HMDB000   |        |    |        |         |       |        |        |        |       |       |        |        |       |        |        |             |  |
| Carbohydrates | Xylose          | 0098      | C00181 | 3  | 0.0051 | 0.07249 | 1.02  | 1.8583 | <0.001 | 0.0037 | 0.838 | 1.316 | 0.0037 | 0.0319 | 0.599 | 1.2375 | 0.0037 | 0.013861781 |  |
| Carbohydrates | Ribulose        | HMDB00000 | C00309 | 1  | 0.1402 | 0.38217 | 0.163 | 0.7683 | <0.001 | <0.001 | 0.722 | 1.514 | <0.001 | <0.001 | 0.534 | 1.9111 | 2E-06  | <0.001      |  |
| Carbohydrates | Xylulose        | HMDB00000 | C00310 | 1  | 0.058  | 0.23552 | 0.215 | 0.9864 | <0.001 | 0.0035 | 1.033 | 1.383 | <0.001 | <0.001 | 0.496 | 1.644  | 4E-06  | <0.001      |  |
| Carbohydrates | Rhamnose        | HMDB00000 | C00507 | 10 | 0.0126 | 0.10419 | 0.599 | 1.3382 | 0.022  | 0.0666 | 0.564 | 1.268 | 0.5801 | 0.813  | -0.21 | 0.117  | 0.029  | 0.066152981 |  |
|               |                 | HMDB000   |        |    |        |         |       |        |        |        |       |       |        |        |       |        |        |             |  |
| Carbohydrates | beta-Fucose     | 3081      | C02095 | 12 | 0.4246 | 0.63142 | -0.02 | 0.3349 | 0.5532 | 0.6838 | 0.003 | 0.802 | 0.2297 | 0.4967 | -0.02 | 0.3279 | 0.2631 | 0.358553093 |  |
| Carbohydrates | Fructose        | HMDB00000 | C02336 | 16 | 0.0188 | 0.12455 | 0.718 | 0.362  | <0.001 | 0.0019 | 2.252 | 1.201 | 0.0022 | 0.0208 | 1.418 | 0.4771 | 8E-05  | 0.001022042 |  |

|                       |                        |              |        |    |        |         |       |        |        |        |       |       |        |        |       |        |        |             |
|-----------------------|------------------------|--------------|--------|----|--------|---------|-------|--------|--------|--------|-------|-------|--------|--------|-------|--------|--------|-------------|
| Carbohydrates         | N-Acetylglucosamine    | HMDB0000215  | C00140 | 12 | 0.8741 | 0.92245 | -0.07 | 0.6856 | <0.001 | 0.0035 | 0.519 | 1.562 | 0.1208 | 0.3005 | 0.176 | 0.7617 | 0.0013 | 0.00612856  |
| SCFAs                 | Propanoic acid         | HMDB000000   | C00163 | 10 | 0.0069 | 0.077   | 0.683 | 1.5451 | 0.0268 | 0.0751 | 0.548 | 0.985 | 0.2654 | 0.5389 | -0.34 | 0.7249 | 0.0004 | 0.002455499 |
| Amino Acids           | Norleucine             | HMDB00001645 | C01933 | 1  | 0.1646 | 0.39943 | 0.257 | 0.8904 | 0.1179 | 0.247  | 0.198 | 0.923 | 0.0587 | 0.2251 | 0.315 | 1.0363 | 0.3431 | 0.443400159 |
| Phenols               | Homovanillic acid      | HMDB000000   | C05582 | 12 | 0.6744 | 0.78943 | -0.04 | 0.2518 | 0.2604 | 0.4081 | 0.077 | 0.9   | 0.6744 | 0.8462 | 0.011 | 0.0455 | 0.3395 | 0.441526714 |
| Amino Acids           | Tryptophan             | HMDB00000929 | C00078 | 5  | 0.0327 | 0.18259 | -0.38 | 1.4182 | 0.0372 | 0.0993 | -0.39 | 1.069 | 0.4663 | 0.7545 | -0.1  | 0.4088 | 0.0201 | 0.04991134  |
| SCFAs                 | Butyric acid           | HMDB000000   | C00246 | 9  | 0.1223 | 0.3428  | 0.205 | 0.9242 | 0.4134 | 0.5531 | 0.109 | 0.399 | 0.3993 | 0.691  | -0.25 | 0.7767 | 0.0535 | 0.110860503 |
| SCFAs                 | Isobutyric acid        | HMDB00001873 | C02632 | 12 | 0.9472 | 0.97157 | -0.13 | 0.2896 | 0.0225 | 0.0666 | 2.549 | 1.208 | 0.9472 | 0.9666 | -0.2  | 0.2364 | 0.0131 | 0.036691375 |
| Benzenoids            | Mandelic acid          | HMDB000000   | C01984 | 12 | 0.3175 | 0.54459 | 0.022 | 1.015  | <0.001 | 0.0013 | 0.797 | 0.934 | 0.1115 | 0.2883 | 0.044 | 0.6183 | 0.0006 | 0.003120262 |
| Organic Acids         | Malonic acid           | HMDB00000691 | C00383 | 14 | 0.3869 | 0.59691 | -0.35 | 0.0219 | 0.2351 | 0.3835 | -0.26 | 0.366 | 0.7402 | 0.8716 | 0.122 | 0.1794 | 0.7401 | 0.779270562 |
| Amino Acids           | N-Tartaric acid        | HMDB000006   | C04148 | 1  | 0.8424 | 0.90125 | 0.044 | 0.2511 | 0.2875 | 0.4368 | 0.821 | 0.618 | 0.2962 | 0.5722 | -1.07 | 0.3927 | 0.2149 | 0.301198836 |
| Carbohydrates         | Tartaric acid          | HMDB00000956 | C00898 | 1  | 0.3175 | 0.54459 | 2.328 | 0.5763 | 0.007  | 0.0273 | 4.743 | 1.141 | 0.0922 | 0.2883 | 2.684 | 0.6213 | 0.0293 | 0.066152981 |
| SCFAs                 | Isovaleric acid        | HMDB000000   | C08262 | 14 | 0.0682 | 0.26242 | 0.483 | 1.181  | 0.5468 | 0.6801 | 0.194 | 0.234 | 0.0551 | 0.2194 | 0.521 | 1.2594 | 0.0807 | 0.148643527 |
| SCFAs                 | Pentanoic acid         | HMDB00000892 | C00803 | 15 | 0.412  | 0.62579 | 0.133 | 0.7092 | 0.2604 | 0.4081 | 0.351 | 0.599 | 0.2631 | 0.5389 | -0.42 | 1.0609 | 0.0246 | 0.059511486 |
| Pyridines             | N-Phenylpropanoic acid | HMDB000003   | -      | 3  | 0.4647 | 0.64663 | 0.896 | 0.9049 | 0.7399 | 0.8319 | 0.312 | 0.42  | 0.5801 | 0.813  | -0.27 | 0.4694 | 0.6136 | 0.678389706 |
| Phenylpropanoic Acids | Phenyllactic acid      | HMDB00000779 | C01479 | 2  | 0.2062 | 0.45106 | 1.336 | 0.7125 | 0.0012 | 0.0076 | 2.147 | 1.738 | 0.2875 | 0.5609 | 1.192 | 0.6793 | 0.0071 | 0.022838158 |
| Organic Acids         | Oxalic acid            | HMDB000002   | C00209 | 9  | 0.0311 | 0.18193 | 0.928 | 1.5695 | 0.8534 | 0.9082 | -0.03 | 0.203 | 0.3568 | 0.6339 | -0.35 | 0.3714 | 0.0248 | 0.059511486 |
| Organic Acids         | Maleic acid            | HMDB000000   | C01384 | 11 | <0.001 | 0.01741 | -0.88 | 2.3177 | 0.0872 | 0.1973 | 0.428 | 0.934 | 0.912  | 0.9502 | -0.05 | 0.0033 | 7E-06  | <0.001      |
| Fatty Acids           | Itaconic acid          | HMDB000002   | C00490 | 12 | 0.6043 | 0.73675 | 0.074 | 0.071  | 0.8271 | 0.891  | -0.09 | 0.723 | 0.9092 | 0.9502 | -0.03 | 0.822  | 0.9672 | 0.967235285 |
| Organic Acids         | Citraconic acid        | HMDB00000634 | C02226 | 7  | 0.0897 | 0.28775 | -0.08 | 0.9995 | 0.9279 | 0.9617 | 0     | 0.306 | 0.1005 | 0.2883 | -0.08 | 0.6193 | 0.0599 | 0.118107903 |
| Organic Acids         | Methylsuccinic acid    | HMDB000001   | -      | 12 | 0.8424 | 0.90125 | -0.08 | 0.0082 | 0.347  | 0.4968 | 0.168 | 0.65  | 0.3175 | 0.5891 | -0.18 | 0.1733 | 0.2194 | 0.305319709 |
| Organic Acids         | Adipic acid            | HMDB00000448 | C06104 | 12 | 0.3327 | 0.5559  | 0.201 | 0.0736 | 0.0329 | 0.0896 | 1.917 | 0.711 | 0.1201 | 0.3005 | 0.883 | 0.1561 | 0.0503 | 0.107711735 |
| Fatty Acids           | Methylglutaric acid    | HMDB000000   | -      | 10 | 0.088  | 0.28775 | 0.205 | 1.1655 | 0.1796 | 0.3249 | 0.174 | 0.76  | 0.841  | 0.9261 | 0.03  | 0.1309 | 0.269  | 0.364179211 |
| Benzoic acids         | Phthalic acid          | HMDB00002107 | C01606 | 16 | 0.615  | 0.73723 | 0.01  | 0.4245 | 0.0512 | 0.1258 | 0.037 | 0.61  | 0.9984 | 0.9984 | 5E-05 | 0.1007 | 0.2792 | 0.372872578 |
| Organic Acids         | Pimelic acid           | HMDB000000   | C02656 | 12 | 0.207  | 0.45106 | 14.13 | 0.344  | 0.0096 | 0.0353 | 17.53 | 1.073 | 0.1242 | 0.3015 | 15.41 | 0.754  | 0.02   | 0.04991134  |
| Fatty Acids           | 3-Methyladipic acid    | HMDB00000555 | -      | 1  | 0.3138 | 0.54459 | 0.431 | 0.3207 | 0.1693 | 0.3149 | 0.687 | 0.863 | 0.5801 | 0.813  | 0.091 | 0.4686 | 0.5188 | 0.629509226 |
| SCFAs                 | 2-Methyladipic acid    | HMDB000031   | -      | 16 | 0.0754 | 0.26378 | 0.365 | 0.889  | <0.001 | 0.0019 | 0.981 | 1.757 | 0.1099 | 0.2883 | 0.311 | 1.0539 | 6E-06  | <0.001      |
| SCFAs                 | 3-Methyladipic acid    | HMDB000003   | -      | 8  | 0.1461 | 0.38268 | -0.69 | 0.8143 | 0.2115 | 0.3628 | -0.89 | 0.663 | 0.0922 | 0.2883 | -0.95 | 0.8911 | 0.2402 | 0.329714158 |
| SCFAs                 | Isocaproic acid        | HMDB000000   | -      | 13 | 0.2564 | 0.51545 | -0.19 | 0.6802 | 0.2875 | 0.4368 | -0.29 | 0.247 | 0.9824 | 0.9873 | 0     | 0.0362 | 0.3552 | 0.456038704 |
| SCFAs                 | Caproic acid           | HMDB00000535 | C01585 | 9  | 0.3096 | 0.54459 | 0.183 | 0.7203 | 0.8302 | 0.891  | 0.038 | 0.079 | 0.882  | 0.9386 | -0.03 | 0.4599 | 0.5259 | 0.630450514 |
| Organic Acids         | Suberic acid           | HMDB000000   | C08278 | 12 | 0.3338 | 0.5559  | 0.027 | 0.141  | 0.0246 | 0.0701 | 1.986 | 1.264 | 0.1105 | 0.2883 | 0.497 | 0.7625 | 0.0582 | 0.116892422 |
| Organic Acids         | Citric acid            | HMDB00000094 | C00158 | 12 | 0.1957 | 0.44265 | -0.26 | 0.7875 | 0.6947 | 0.8085 | -0.3  | 0.66  | 0.5501 | 0.8109 | -0.33 | 0.4163 | 0.6723 | 0.723200219 |
| Organic Acids         | Isocitric acid         | HMDB000000   | C00311 | 12 | 0.7085 | 0.79211 | -0.05 | 0.4303 | 0.3164 | 0.4664 | 0.025 | 0.684 | 0.3397 | 0.609  | -0.26 | 0.4352 | 0.272  | 0.365671548 |
| Fatty Acids           | Heptanoic acid         | HMDB00000666 | C17714 | 6  | 0.1733 | 0.4154  | -0.34 | 0.2424 | 0.2257 | 0.3807 | -0.33 | 0.81  | 0.0454 | 0.2055 | -0.5  | 1.3645 | 0.2012 | 0.286060167 |

|               |                    |          |        |    |        |         |       |        |        |        |       |       |        |        |       |        |        |             |
|---------------|--------------------|----------|--------|----|--------|---------|-------|--------|--------|--------|-------|-------|--------|--------|-------|--------|--------|-------------|
| Organic Acids | Pyruvic acid       | HMDB0000 | C00022 | 6  | 0.1881 | 0.43524 | -0.48 | 0.2487 | 0.1783 | 0.3249 | -0.37 | 0.768 | <0.001 | <0.001 | -1.57 | 2.3614 | 0.0002 | 0.001460997 |
| Bile Acids    | TCDC               | 0951     | C05465 | 16 | 0.1184 | 0.3428  | 2.22  | 0.3909 | <0.001 | 0.005  | 3.623 | 1.258 | 0.9092 | 0.9502 | 0.45  | 0.0952 | 0.0004 | 0.002455499 |
| Bile Acids    | aMCA               | HMDB0000 | C17647 | 4  | 0.1461 | 0.38268 | -0.05 | 0.8295 | 0.4769 | 0.6203 | -0.03 | 0.752 | 0.5998 | 0.8214 | -0.05 | 0.515  | 0.6028 | 0.673879841 |
| Bile Acids    | bMCA               | 0865     | -      | 4  | 0.1461 | 0.38268 | -0.05 | 0.8295 | 0.4769 | 0.6203 | -0.03 | 0.752 | 0.5998 | 0.8214 | -0.05 | 0.515  | 0.6028 | 0.673879841 |
| Bile Acids    | HCA                | HMDB0000 | -      | 4  | 0.6686 | 0.78943 | 0     | 0.5618 | 0.78   | 0.8547 | 0.021 | 0.168 | 0.3959 | 0.691  | -0.18 | 0.614  | 0.5258 | 0.630450514 |
| Bile Acids    | CA                 | 0619     | C00695 | 4  | 0.0144 | 0.10987 | -0.87 | 1.8791 | 0.1896 | 0.3369 | -0.74 | 0.795 | 0.3628 | 0.639  | -0.61 | 0.4379 | 0.1753 | 0.26429579  |
| Organic Acids | Oxoglutaric acid   | HMDB0000 | C00026 | 10 | 0.0442 | 0.20434 | 0.891 | 1.5354 | <0.001 | <0.001 | 0.879 | 1.487 | 0.3175 | 0.5891 | 0.106 | 0.7912 | 0.0008 | 0.004246796 |
| Bile Acids    | GCA                | 0138     | C01921 | 12 | 0.7696 | 0.8415  | 0.166 | 0.2691 | 0.0209 | 0.0649 | 1.556 | 0.728 | 0.7357 | 0.8715 | -0.16 | 0.5175 | 0.0162 | 0.041832276 |
| Fatty Acids   | Octanoic acid      | HMDB0000 | C06423 | 12 | 0.2786 | 0.53311 | -0.17 | 0.5476 | 0.0688 | 0.1592 | 2.131 | 1.02  | 0.0977 | 0.2883 | -0.25 | 1.2516 | 0.0093 | 0.02776942  |
| Bile Acids    | bUDCA              | 0686     | C17662 | 4  | 0.4304 | 0.63142 | -0.33 | 0.9242 | 0.2172 | 0.3695 | -0.51 | 0.392 | 0.6858 | 0.8462 | 0.558 | 0.4808 | 0.2832 | 0.375735466 |
| Bile Acids    | bHDCA              | HMDB0000 | -      | 6  | 0.9816 | 0.99235 | -0.06 | 0.0858 | 0.386  | 0.5409 | -0.12 | 0.723 | 0.5291 | 0.81   | -0.01 | 1.0778 | 0.6375 | 0.693274003 |
| Bile Acids    | UDCA               | 0946     | C07880 | 2  | 0.2164 | 0.46303 | -0.61 | 1.0712 | 0.9754 | 0.9809 | -0.09 | 0.559 | 0.8396 | 0.9261 | 0.141 | 0.5293 | 0.59   | 0.667115721 |
| Bile Acids    | bDCA               | -        | -      | 8  | 0.4849 | 0.65341 | 0.008 | 0.8571 | 0.1262 | 0.2563 | -0.09 | 1.01  | 0.0735 | 0.2612 | -0.06 | 1.4472 | 0.1057 | 0.181412743 |
| Bile Acids    | CDCA               | 0518     | C02528 | 13 | 0.0037 | 0.0642  | -0.97 | 1.9874 | 0.0439 | 0.1105 | -1.33 | 0.75  | 0.5801 | 0.813  | -0.2  | 0.0776 | 0.0098 | 0.028794967 |
| Bile Acids    | DCA                | HMDB0000 | C04483 | 8  | 0.0442 | 0.20434 | -0.7  | 1.4687 | 0.0129 | 0.045  | -1.57 | 1.445 | 0.0081 | 0.0597 | -0.94 | 2.0178 | 0.008  | 0.025358738 |
| Bile Acids    | isoDCA             | 2536     | C17661 | 14 | 0.7639 | 0.83983 | 0.091 | 0.2942 | 0.2319 | 0.3835 | -0.04 | 1.047 | 0.6796 | 0.8462 | 0.081 | 0.2817 | 0.1603 | 0.251163974 |
| Fatty Acids   | Nonanoic acid      | HMDB0000 | C01601 | 16 | 0.7049 | 0.79211 | 0.099 | 0.3487 | 0.0228 | 0.0666 | 0.768 | 1.153 | 0.8017 | 0.9084 | -0.07 | 0.4145 | 0.0049 | 0.017390693 |
| Fatty Acids   | Decanoic acid      | 0511     | C01571 | 12 | 0.4379 | 0.63142 | -0.31 | 0.5643 | 0.0225 | 0.0666 | 3.266 | 1.14  | 0.2758 | 0.5435 | -0.57 | 0.0595 | 0.005  | 0.017390693 |
| Fatty Acids   | Undecylenic        | HMDB0033 | C13910 | 6  | 0.5435 | 0.70505 | -0.13 | 0.0302 | <0.001 | 0.0027 | -2.76 | 1.819 | 0.0032 | 0.0292 | -1.6  | 1.9347 | 0.0005 | 0.003085233 |
| Bile Acids    | GCDCA              | 0637     | C05466 | 1  | 0.3869 | 0.59691 | 0.242 | 0.5814 | 0.007  | 0.0273 | 0.897 | 1.137 | 0.6109 | 0.8214 | 0.106 | 0.7113 | 0.0649 | 0.123058223 |
| Bile Acids    | GDCA               | HMDB0000 | C05464 | 6  | 1      | 1       | -0.02 | 0.2832 | 0.2059 | 0.3613 | -0.53 | 0.692 | 0.1101 | 0.2883 | -0.49 | 1.4866 | 0.3591 | 0.458136424 |
| Fatty Acids   | Undecanoic acid    | 0947     | C17715 | 16 | 0.5331 | 0.69793 | 0.232 | 0.6776 | 0.0768 | 0.1756 | 0.722 | 0.902 | 0.7258 | 0.8648 | -0.15 | 0.3722 | 0.0452 | 0.097810062 |
| Fatty Acids   | 5-Dodecenoic       | HMDB0000 | -      | 8  | 0.0442 | 0.20434 | -0.98 | 1.0462 | 0.0022 | 0.0114 | -1.6  | 0.837 | <0.001 | 0.0112 | -1.51 | 1.8089 | 0.0083 | 0.025661803 |
| Fatty Acids   | Dodecanoic acid    | 0638     | C02679 | 11 | 0.0275 | 0.17109 | -0.73 | 1.3143 | 0.1335 | 0.2606 | -0.79 | 0.22  | 0.1115 | 0.2883 | -0.86 | 0.0644 | 0.1841 | 0.269434721 |
| Fatty Acids   | 12-Tridecenoic     | -        | -      | 12 | 0.5208 | 0.69093 | 0.169 | 0.1695 | 0.347  | 0.4968 | 0.21  | 0.37  | 0.6423 | 0.83   | 0.081 | 0.4835 | 0.8164 | 0.846208063 |
| Fatty Acids   | Tridecanoic acid   | 0910     | C17076 | 12 | 0.4751 | 0.65341 | 0.235 | 0.6537 | 0.9754 | 0.9809 | 0.023 | 0.472 | 0.4583 | 0.7545 | 0.185 | 0.2829 | 0.587  | 0.667115721 |
| Fatty Acids   | Myristoleic acid   | HMDB0002 | C08322 | 5  | 0.0846 | 0.2854  | -0.79 | 1.0513 | 0.0688 | 0.1592 | -1.06 | 0.723 | 0.2181 | 0.482  | -0.51 | 1.1699 | 0.1922 | 0.279234018 |
| Fatty Acids   | Myristelaidic acid | HMDB006  | 2248   | 12 | 0.3107 | 0.54459 | -1.17 | 0.5432 | 0.1012 | 0.2189 | -2    | 0.459 | 0.0339 | 0.1644 | -1.14 | 1.3806 | 0.1796 | 0.268676669 |
| Fatty Acids   | Ricinoleic acid    | HMDB0034 | C08365 | 7  | 0.1518 | 0.38936 | -0.33 | 0.9298 | 0.9543 | 0.9766 | -0.02 | 0.027 | 0.1115 | 0.2883 | -0.42 | 1.2999 | 0.305  | 0.399256464 |
| Fatty Acids   | 12-Myristic acid   | HMDB006  | -      | 9  | 0.2564 | 0.51545 | 0.171 | 1.0626 | 0.3164 | 0.4664 | 0.084 | 0.921 | 0.5196 | 0.8034 | 0.134 | 0.3776 | 0.4933 | 0.602242014 |
| Fatty Acids   | Myristic acid      | HMDB0000 | C06424 | 12 | 0.9824 | 0.99235 | -0.14 | 0.2086 | 0.4865 | 0.6205 | 0.322 | 0.57  | 0.8079 | 0.9084 | -0.11 | 0.0301 | 0.7881 | 0.821085916 |
| Fatty Acids   | Pentadecanoic acid | HMDB0000 | 0826   | 12 | 0.5801 | 0.72152 | 0.132 | 0.5753 | 0.2351 | 0.3835 | 0.346 | 0.593 | 0.912  | 0.9502 | -0.07 | 0.6092 | 0.5715 | 0.665242357 |
| Fatty Acids   | Palmitoleic acid   | HMDB0003 | C08362 | 15 | 0.733  | 0.81488 | 0.116 | 0.4068 | 0.4895 | 0.6205 | 0.28  | 0.504 | 0.568  | 0.813  | -0.19 | 0.576  | 0.5724 | 0.665242357 |

|               |                   |          |        |    |        |         |       |        |        |        |       |       |        |        |       |        |        |             |
|---------------|-------------------|----------|--------|----|--------|---------|-------|--------|--------|--------|-------|-------|--------|--------|-------|--------|--------|-------------|
| Fatty Acids   | 10Z-              | HMDB006  | -      | 16 | 0.6792 | 0.79037 | 0.175 | 0.5127 | 0.4134 | 0.5531 | 0.645 | 0.704 | 0.5438 | 0.8109 | -0.14 | 0.2084 | 0.5401 | 0.636034564 |
| Fatty Acids   | alpha-Linolenic   | HMDB0001 | C06427 | 15 | 0.7739 | 0.84154 | 0.075 | 0.2695 | 0.4865 | 0.6205 | 0.314 | 0.478 | 0.1593 | 0.3729 | -0.74 | 1.1444 | 0.1363 | 0.224197294 |
|               | gamma-            | HMDB000  |        |    |        |         |       |        |        |        |       |       |        |        |       |        |        |             |
| Fatty Acids   | Linolenic acid    | 3073     | C06426 | 16 | 0.3397 | 0.55864 | 0.918 | 0.7207 | 0.0439 | 0.1105 | 1.29  | 1.133 | 0.707  | 0.8592 | 0.101 | 0.638  | 0.0288 | 0.066152981 |
| Fatty Acids   | Linoleic acid     | HMDB0000 | C01595 | 10 | 0.1539 | 0.38936 | 0.422 | 1.1452 | 0.1198 | 0.2483 | 0.6   | 0.865 | 0.3215 | 0.5891 | -0.32 | 0.8895 | 0.0535 | 0.110860503 |
|               |                   | HMDB000  |        |    |        |         |       |        |        |        |       |       |        |        |       |        |        |             |
| Fatty Acids   | Linoelaidic acid  | 6270     | -      | 15 | 0.697  | 0.79211 | 0.183 | 0.5299 | 0.125  | 0.2563 | 0.923 | 0.872 | 0.2404 | 0.5143 | -0.66 | 1.1165 | 0.0563 | 0.114407548 |
| Fatty Acids   | EPA               | HMDB0001 | C06428 | 3  | 0.0895 | 0.28775 | 4.617 | 1.4092 | 0.0625 | 0.1481 | 3.958 | 0.833 | 0.0316 | 0.157  | 4.138 | 1.0327 | 0.1475 | 0.240539662 |
|               |                   | HMDB000  |        |    |        |         |       |        |        |        |       |       |        |        |       |        |        |             |
| Fatty Acids   | Arachidonic acid  | 1043     | C00219 | 10 | 0.2038 | 0.45106 | 0.359 | 1.2004 | 0.1161 | 0.2458 | 0.369 | 1.095 | 0.6158 | 0.8224 | 0.102 | 0.4564 | 0.3734 | 0.467356495 |
|               | 8,11,14-          |          |        |    |        |         |       |        |        |        |       |       |        |        |       |        |        |             |
| Fatty Acids   | Eicosatrienoic    | HMDB0002 | C03242 | 10 | 0.0344 | 0.18259 | 0.936 | 1.5072 | 0.0051 | 0.0227 | 1.284 | 1.578 | 0.1815 | 0.4105 | 0.535 | 0.7195 | 0.0141 | 0.038524316 |
|               |                   | HMDB000  |        |    |        |         |       |        |        |        |       |       |        |        |       |        |        |             |
| Fatty Acids   | DHA               | 2183     | C06429 | 14 | 0.1115 | 0.3313  | 0.768 | 1.4623 | 0.957  | 0.9766 | -0.02 | 0.143 | 0.1699 | 0.3886 | 0.428 | 0.7454 | 0.1821 | 0.269434721 |
| Fatty Acids   | DPA               | HMDB0006 | C16513 | 10 | 0.3869 | 0.59691 | 0.889 | 0.9398 | 0.2351 | 0.3835 | 0.484 | 0.681 | 0.4647 | 0.7545 | 0.2   | 0.2561 | 0.6817 | 0.729349363 |
|               |                   | HMDB000  |        |    |        |         |       |        |        |        |       |       |        |        |       |        |        |             |
| Fatty Acids   | DPAn-6            | 1976     | -      | 14 | 0.4779 | 0.65341 | 0.362 | 0.7475 | 0.7226 | 0.8312 | 0.177 | 0.364 | 0.5501 | 0.8109 | -0.01 | 0.515  | 0.9029 | 0.912098904 |
| Fatty Acids   | Adrenic acid      | HMDB0002 | C16527 | 16 | 0.238  | 0.49329 | 0.725 | 0.8888 | 0.0106 | 0.0376 | 1.268 | 1.392 | 0.2758 | 0.5435 | 0.326 | 0.5394 | 0.0597 | 0.118107903 |
|               |                   | HMDB000  |        |    |        |         |       |        |        |        |       |       |        |        |       |        |        |             |
| Organic Acids | Succinic acid     | 0254     | C00042 | 11 | 0.0988 | 0.30609 | -0.5  | 1.1445 | 0.7399 | 0.8319 | -0.15 | 0.555 | 0.631  | 0.83   | 0.118 | 0.0972 | 0.0379 | 0.08387254  |
| Organic Acids | Citramalic acid   | HMDB0000 | C00815 | 12 | 0.4379 | 0.63142 | -0.2  | 0.1546 | 0.8801 | 0.9316 | -0.01 | 0.611 | 0.4869 | 0.7751 | 0.145 | 0.4847 | 0.575  | 0.665242357 |
|               | Heptadecanoic     | HMDB000  |        |    |        |         |       |        |        |        |       |       |        |        |       |        |        |             |
| Fatty Acids   | acid              | 2259     | -      | 16 | 0.707  | 0.79211 | 0.514 | 0.6317 | 0.0908 | 0.2009 | 1.279 | 1.196 | 0.8771 | 0.9384 | -0.14 | 0.097  | 0.1828 | 0.269434721 |
| Fatty Acids   | Oleic acid        | HMDB0000 | C00712 | 10 | 0.1338 | 0.36983 | 0.345 | 1.1887 | 0.1507 | 0.2856 | 0.338 | 0.995 | 0.7965 | 0.9084 | -0.06 | 0.1768 | 0.0854 | 0.154481889 |
| Fatty Acids   | 10Z-              | HMDB0001 | -      | 12 | 0.6109 | 0.73675 | -0.38 | 0.3217 | 0.4865 | 0.6205 | 0.208 | 0.772 | 0.6109 | 0.8214 | -0.24 | 0.0924 | 0.5401 | 0.636034564 |
| Carnitines    | Carnitine         | HMDB0000 | C00318 | 15 | 0.9147 | 0.94804 | 0.029 | 0.15   | 0.3004 | 0.4494 | 0.282 | 0.73  | 0.4855 | 0.7751 | -0.16 | 0.4413 | 0.3648 | 0.460850622 |
|               |                   | HMDB000  |        |    |        |         |       |        |        |        |       |       |        |        |       |        |        |             |
| Carnitines    | Acetylcarnitine   | 0201     | C02571 | 15 | 0.8783 | 0.92245 | -0.03 | 0.1384 | 0.4491 | 0.5959 | 0.106 | 0.799 | 0.0756 | 0.2638 | -0.53 | 0.7293 | 0.0898 | 0.158226749 |
| Carnitines    | Propionylcarniti  | HMDB0000 | C03017 | 16 | 0.3696 | 0.59308 | 0.3   | 0.3817 | 0.0059 | 0.0248 | 0.907 | 1.494 | 0.7572 | 0.8863 | -0.08 | 0.343  | 0.0051 | 0.017486838 |
|               | Malonylcarnitin   | HMDB000  |        |    |        |         |       |        |        |        |       |       |        |        |       |        |        |             |
| Carnitines    | e                 | 2095     | -      | 12 | 0.1921 | 0.43933 | -0.06 | 1.0785 | 0.0319 | 0.0882 | 0.168 | 1.16  | 0.7739 | 0.8902 | -0.02 | 0.0695 | 0.0101 | 0.029087    |
| Carnitines    | Butyrylcarnitine  | HMDB0002 | C02862 | 15 | 0.6109 | 0.73675 | -0.04 | 0.5046 | 0.1335 | 0.2606 | 0.463 | 0.842 | 0.0275 | 0.1514 | -0.3  | 0.6959 | 0.0159 | 0.041619728 |
|               | 2-                | HMDB000  |        |    |        |         |       |        |        |        |       |       |        |        |       |        |        |             |
| Carnitines    | Methylbutyroylc   | 0378     | -      | 7  | 0.0243 | 0.15591 | -0.17 | 1.4797 | 0.347  | 0.4968 | 0.023 | 0.027 | 0.1461 | 0.3462 | -0.16 | 1.2195 | 0.0031 | 0.011844061 |
| Carnitines    | Valeryl carnitine | HMDB0013 | -      | 15 | 0.707  | 0.79211 | -0.12 | 0.097  | 0.1335 | 0.2606 | 0.5   | 0.678 | 0.6423 | 0.83   | -0.05 | 0.6749 | 0.1989 | 0.28471129  |
|               | Isovelarylcarniti | HMDB000  |        |    |        |         |       |        |        |        |       |       |        |        |       |        |        |             |
| Carnitines    | ne                | 0688     | -      | 15 | 0.707  | 0.79211 | -0.12 | 0.097  | 0.1335 | 0.2606 | 0.5   | 0.678 | 0.6423 | 0.83   | -0.05 | 0.6749 | 0.1989 | 0.28471129  |
|               | 3-                |          |        |    |        |         |       |        |        |        |       |       |        |        |       |        |        |             |
|               | Hydroxylisovale   |          |        |    |        |         |       |        |        |        |       |       |        |        |       |        |        |             |
| Carnitines    | rylcarnitine      | -        | -      | 12 | 0.0756 | 0.26378 | 0.176 | 0.7897 | <0.001 | 0.0019 | 0.624 | 1.551 | 0.0549 | 0.2194 | 0.177 | 1.0826 | 0.0004 | 0.002455499 |
|               | Glutaryl carnitin | HMDB001  |        |    |        |         |       |        |        |        |       |       |        |        |       |        |        |             |
| Carnitines    | e                 | 3130     | -      | 13 | 0.007  | 0.077   | -1.1  | 1.9659 | 0.2514 | 0.4068 | -0.35 | 0.618 | 0.4923 | 0.7775 | -0.47 | 0.4844 | 0.0102 | 0.029087    |
| Carnitines    | Hexanylcarnitin   | HMDB0000 | -      | 7  | 0.0144 | 0.10987 | -0.36 | 1.5109 | 0.2604 | 0.4081 | -0.22 | 0.255 | <0.001 | <0.001 | -0.61 | 2.1799 | 0.0003 | 0.002455499 |
|               |                   | HMDB006  |        |    |        |         |       |        |        |        |       |       |        |        |       |        |        |             |
| Carnitines    | Adipoylcarnitine  | 1677     | -      | 15 | 0.5501 | 0.70505 | -0.09 | 0.3823 | 0.7859 | 0.8547 | -0.07 | 0.779 | 0.0125 | 0.0777 | -0.31 | 0.7721 | 0.1076 | 0.182961667 |
| Carnitines    | Octanoylcarniti   | HMDB0000 | C02838 | 8  | <0.001 | 0.01308 | -1.19 | 1.8693 | 0.0156 | 0.0509 | -1.55 | 0.994 | <0.001 | 0.0011 | -2.25 | 2.3595 | 0.0002 | 0.001896725 |
|               | Decanoylcarniti   | HMDB000  |        |    |        |         |       |        |        |        |       |       |        |        |       |        |        |             |
| Carnitines    | ne C10            | 0651     | -      | 8  | <0.001 | 0.01124 | -1.04 | 1.929  | 0.0106 | 0.0376 | -1.31 | 1.309 | <0.001 | <0.001 | -1.41 | 2.4164 | 0.0003 | 0.002266751 |
| Carnitines    | Lauroyl carnitine | HMDB0002 | -      | 8  | 0.0561 | 0.23247 | -0.32 | 1.5984 | <0.001 | 0.003  | -1.73 | 1.583 | <0.001 | 0.0069 | -2.31 | 2.0478 | 0.0012 | 0.005766773 |

|             |                    |             |        |    |        |         |       |        |        |        |       |       |        |        |       |        |        |             |
|-------------|--------------------|-------------|--------|----|--------|---------|-------|--------|--------|--------|-------|-------|--------|--------|-------|--------|--------|-------------|
| Carnitines  | Palmitoylcarnitine | HMDB0000222 | C02990 | 11 | 0.0808 | 0.2774  | -0.64 | 1.219  | 0.9005 | 0.9431 | -0.05 | 0.111 | 0.9382 | 0.9666 | 0.026 | 0.0232 | 0.2399 | 0.329714158 |
| Carnitines  | Oleylcarnitine     | HMDB00005   | -      | 1  | 0.441  | 0.63143 | 0.275 | 0.4818 | 0.0086 | 0.0324 | 1.18  | 1.505 | 0.035  | 0.166  | 0.599 | 1.3856 | 0.0143 | 0.038552004 |
| Carnitines  | Linoleylcarnitine  | HMDB0006469 | -      | 1  | 0.1838 | 0.43026 | -0.81 | 0.5237 | 0.0132 | 0.0452 | 1.029 | 1.236 | 0.0588 | 0.2251 | 0.669 | 0.8809 | 0.0024 | 0.009752072 |
| Carnitines  | Stearylarnitine    | HMDB00000   | -      | 2  | 0.8424 | 0.90125 | -0.27 | 0.3862 | 0.1507 | 0.2856 | 0.181 | 1.181 | 0.0682 | 0.2467 | 0.458 | 1.286  | 0.1149 | 0.193855084 |
| Bile Acids  | NorCA              | -           | -      | 1  | 0.0039 | 0.0642  | 0.011 | 1.2554 | <0.001 | 0.0041 | 0.152 | 1.089 | 0.0229 | 0.1303 | 0     | 0.5068 | 0.002  | 0.008598336 |
| Fatty Acids | 2,2-               | -           | -      | 6  | 0.3175 | 0.54459 | -0.02 | 0.3565 | 0.2604 | 0.4081 | -0.03 | 0.602 | 0.5801 | 0.813  | 0.004 | 0.7027 | 0.6648 | 0.718999439 |

**Table S4. Characteristics of validation cohort patients infected with COVID-19 at admission according to disease severity**

| Characteristics                                 | Mild (n=46)           | Recovery (n=22)       | Severe (n=22)         | P      |
|-------------------------------------------------|-----------------------|-----------------------|-----------------------|--------|
| Age, years                                      | 49.85(45.85-53.85)    | 51.14(45.00-57.27)    | 65.73(60.55-70.90)    | <0.001 |
| Gender                                          |                       |                       |                       |        |
| Male                                            | 22(47.8%)             | 11(50.0%)             | 13(59.1%)             | 0.874  |
| Female                                          | 24(52.2%)             | 11(50.0%)             | 9(40.9%)              |        |
| Coexisting disorder <sup>a</sup>                | 27(58.7%)             | 10(45.5%)             | 9(40.9%)              | 0.324  |
| Clinical signs and symptoms                     |                       |                       |                       |        |
| Fever                                           | 38(82.6%)             | 15(68.2%)             | 18(81.8%)             | 0.366  |
| Cough                                           | 36(78.3%)             | 13(59.1%)             | 12(54.5%)             | 0.089  |
| Chilly                                          | 10(21.7%)             | 6(27.3%)              | 0(0.0%)               | 0.037  |
| Myalgia                                         | 14(30.4%)             | 2(9.1%)               | 0(0.0%)               | 0.004  |
| Fatigue                                         | 22(47.8%)             | 1(4.5%)               | 4(18.2%)              | <0.001 |
| Rhinorrhoea                                     | 10(21.7%)             | 0(0.0%)               | 0(0.0%)               | 0.005  |
| Shortness of breath                             | 4(8.7%)               | 1(4.5%)               | 19(86.4%)             | <0.001 |
| Sore throat                                     | 10(21.7%)             | 0(0.0%)               | 2(9.1%)               | 0.038  |
| Diarrhea                                        | 0(0.0%)               | 1(4.5%)               | 0(0.0%)               | 0.210  |
| Chest CT findings                               |                       |                       |                       |        |
| Ground-glass opacity                            | 24(52.2%)             | 17(77.3%)             | 21(95.5%)             | 0.001  |
| Local mottling shadow                           | 4(8.7%)               | 2(9.1%)               | 0(0.0%)               | 0.353  |
| Bilateral mottling shadow                       | 19(41.3%)             | 7(31.8%)              | 4(18.2%)              | 0.164  |
| Laboratory parameters                           |                       |                       |                       |        |
| Leucocytes( $\times 10^9$ /L; NR:3.5-9.5)       | 6.41(5.78-7.07)       | 4.91(4.07-5.76)       | 6.60(5.01-8.21)       | 0.050  |
| Lymphocytes( $\times 10^9$ /L;<br>NR:1.1-3.2)   | 1.38(1.15-1.61)       | 1.48(1.04-1.93)       | 0.77(0.61-0.94)       | 0.006  |
| Neutrophils( $\times 10^9$ /L; NR:1.8-6.3)      | 3.60(3.06-4.15)       | 3.16(2.74-3.59)       | 3.54(2.81-4.27)       | 0.570  |
| Platelets( $\times 10^9$ /L;<br>NR:125.0-350.0) | 183.92(165.24-202.60) | 175.27(150.12-200.42) | 180.32(151.46-209.17) | 0.864  |
| HGB(g/L; NR:130.0-175.0)                        | 126.44(119.35-133.54) | 124.63(108.37-140.89) | 126.68(118.66-134.70) | 0.958  |
| APTT(s; NR:21.0-37.0) <sup>b</sup>              | 39.10(37.81-40.39)    | 40.04(38.07-42.02)    | 40.35(38.57-42.12)    | 0.523  |
| PT(s; NR:10.5-13.5) <sup>b</sup>                | 13.87(13.57-14.18)    | 14.30(13.49-15.10)    | 13.93(13.25-14.61)    | 0.447  |
| D-dimer(mg/L; NR:0-500) <sup>b</sup>            | 2063.9(1189.3-2938.6) | 1867.4(1175.4-2559.5) | 1600.7(1365.4-1835.9) | 0.816  |
| Albumin (g/L; NR:40.0-55.0)                     | 38.79(36.85-40.73)    | 38.47(36.26-40.68)    | 35.41(33.44-37.39)    | 0.071  |
| ALT (U/L; NR:9.0-50.0)                          | 37.41(22.91-51.92)    | 37.32(26.02-48.62)    | 50.70(22.08-79.31)    | 0.543  |
| AST (U/L; NR:15.0-40.0)                         | 26.77(22.34-31.20)    | 37.02(18.77-35.27)    | 23.95(22.08-25.82)    | 0.707  |
| TB ( $\mu$ mol/L; NR:0.0-21.0)                  | 15.32(11.53-19.12)    | 13.35(6.96-19.73)     | 16.22(12.15-20.29)    | 0.732  |
| BUN (mmol/L; NR:3.6-9.5)                        | 4.72(3.98-5.46)       | 4.30(3.31-5.29)       | 4.35(4.10-4.59)       | 0.672  |
| Scr ( $\mu$ mol/L; NR:57.0-111.0)               | 69.78(61.11-78.46)    | 68.41(49.99-86.83)    | 69.26(66.07-72.45)    | 0.984  |
| CK (U/L; NR:50.0-310.0)                         | 79.03(64.33-93.73)    | 71.12(47.24-95.00)    | 85.68(67.52-103.84)   | 0.612  |
| LDH (U/L; NR:120.0-250.0)                       | 218.71(189.48-247.94) | 199.36(165.60-233.12) | 217.89(195.28-240.50) | 0.651  |
| CRP (mg/L; NR:0.0-5.0)                          | 20.13(15.42-24.84)    | 15.79(10.81-20.76)    | 16.25(11.07-21.44)    | 0.377  |

Abbreviation: HGB, hemoglobin; APTT, activated partial thromboplastin time; PT, prothrombin time; ALT, alanine aminotransferase; AST, aspartate aminotransferase; TB, total bilirubin; BUN, blood urea nitrogen; Scr, serum creatinine; CK, creatine kinase; LDH, lactate dehydrogenase; CRP, C-reactive protein; NR, normal reference. <sup>a</sup> Including hypertension, type 2 diabetes mellitus, cancer, hyperlipidemia, liver disease and other chronic diseases, <sup>b</sup> missing for 9 severe group.

**Table S5. Metabolites quantified in the discovery cohort by targeted metabolomics with FDR<0.05 (related to figure 2-A)**

| Class           | Name                           | HMDB_ID     | KEGG_ID | Normal VS Mild |         |        |        | Normal VS Severe |        |        |       | Normal VS Recovery |        |        |        | Total  |        |
|-----------------|--------------------------------|-------------|---------|----------------|---------|--------|--------|------------------|--------|--------|-------|--------------------|--------|--------|--------|--------|--------|
|                 |                                |             |         | P              | FDR     | log2FC | VIP    | P                | FDR    | log2FC | VIP   | P                  | FDR    | log2FC | VIP    | P      | FDR    |
| Amino Acids     | Arginine                       | HMDB0000517 | C00062  | 0.914          | 0.948   | 0.02   | 0.0469 | 0.0019           | 0.011  | -0.48  | 1.643 | 0.0089             | 0.060  | -0.37  | 1.3098 | 0.0025 | 0.0098 |
| Amino Acids     | Ornithine                      | HMDB0000214 | C00077  | 0.0311         | 0.18193 | 0.371  | 1.5216 | <0.001           | 0.0035 | 0.981  | 1.794 | <0.001             | <0.001 | 1.56   | 2.3139 | 0.00   | <0.001 |
| Amino Acids     | Glutamine                      | HMDB0000641 | C00064  | 0.037          | 0.185   | -0.36  | 1.4032 | 0.0019           | 0.011  | -0.62  | 1.791 | 0.0043             | 0.035  | -0.48  | 1.8552 | 0.0019 | 0.0082 |
| Amino Acids     | Glutamic acid                  | HMDB0000148 | C00025  | <0.001         | 0.00256 | 0.82   | 1.8495 | <0.001           | <0.001 | 1.482  | 2.015 | <0.001             | <0.001 | 1.45   | 2.6133 | 0.00   | <0.001 |
| Amino Acids     | beta-Alanine                   | HMDB0000056 | C00099  | 0.881          | 0.922   | -0.01  | 0.3399 | 0.0439           | 0.111  | 0.54   | 1.32  | 0.0311             | 0.157  | 0.13   | 0.8346 | 0.0063 | 0.0204 |
| Amino Acids     | GABA                           | HMDB0000112 | C00334  | <0.001         | 0.01124 | -0.59  | 2.402  | 0.019            | 0.0594 | -0.53  | 1.12  | 0.0094             | 0.060  | -0.39  | 1.6741 | 0.00   | 0.0081 |
| Amino Acids     | Creatine                       | HMDB0000064 | C00300  | 0.292          | 0.543   | 0.34   | 0.6911 | 0.0036           | 0.016  | 1.97   | 1.569 | 0.2758             | 0.543  | -0.26  | 0.5015 | 0.0002 | 0.0019 |
| Organic Acids   | Hydroxypropionic acid          | HMDB0000700 | C01013  | 0.8771         | 0.92245 | -0.13  | 0.1221 | 0.016            | 0.0509 | 0.484  | 0.877 | 0.4369             | 0.732  | -0.12  | 0.5262 | 0.01   | 0.0268 |
| Amino Acids     | Homocitrulline                 | HMDB0000679 | C02427  | 0.317          | 0.545   | -0.16  | 1.1381 | 0.0036           | 0.016  | 1.15   | 1.487 | 0.7739             | 0.890  | 0.16   | 0.4166 | 0.0004 | 0.0025 |
| Organic Acids   | Lactic acid                    | HMDB0000190 | C00186  | 0.4647         | 0.64663 | 0.105  | 0.5539 | <0.001           | <0.001 | 1.238  | 2.229 | <0.001             | <0.001 | 1.16   | 2.7261 | 0.00   | <0.001 |
| Amino Acids     | 2-Phenylglycine                | HMDB0002210 | -       | 0.076          | 0.264   | 0.09   | 0.8204 | <0.001           | 0.003  | 0.46   | 1.398 | 0.0311             | 0.157  | 0.08   | 0.5041 | 0.0012 | 0.006  |
| Phenylpropanoid | Dihydroxyhydrocinnamic acid    | HMDB0000423 | C10447  | 0.3175         | 0.54459 | -0.5   | 0.2193 | <0.001           | 0.0019 | 1.653  | 1.775 | <0.001             | <0.001 | 2.00   | 2.5133 | 0.00   | <0.001 |
| Amino Acids     | Asparagine                     | HMDB0000168 | C00152  | 0.011          | 0.098   | -0.34  | 1.2909 | 0.8328           | 0.891  | 0.08   | 0.333 | 0.0094             | 0.060  | 0.20   | 1.3742 | 0.0001 | 0.0015 |
| Amino Acids     | Kynurenine                     | HMDB0000684 | C00328  | 0.0358         | 0.18259 | 0.426  | 1.133  | 0.004            | 0.0165 | 1.05   | 1.398 | 0.9472             | 0.967  | -0.03  | 0.3139 | 0.01   | 0.0186 |
| Amino Acids     | Aspartic acid                  | HMDB0000191 | C00049  | <0.001         | 0.002   | 1.40   | 2.4534 | <0.001           | 0.003  | 1.16   | 1.623 | <0.001             | <0.001 | 1.12   | 2.2054 | 0.0001 | 0.0013 |
| Benzenoids      | ortho-Hydroxyphenylacetic acid | HMDB0000669 | C05852  | 0.588          | 0.72678 | -0.02  | 0.3463 | <0.001           | 0.0037 | 1.614  | 1.344 | 0.6888             | 0.846  | -0.04  | 0.3361 | 0.00   | <0.001 |
| Organic Acids   | Malic acid                     | HMDB0000156 | C00149  | 0.426          | 0.631   | 0.16   | 0.3095 | <0.001           | 0.004  | 0.71   | 1.387 | <0.001             | 0.007  | 0.76   | 1.6304 | 7E-05  | 0.001  |
| Amino Acids     | N-Acetylaspartic acid          | HMDB0000812 | C01042  | 0.275          | 0.53291 | -0.56  | 0.9152 | 0.044            | 0.1105 | 0.917  | 0.922 | 0.6832             | 0.846  | 0.18   | 0.0024 | 0.00   | 0.0102 |
| Indoles         | Indoleacetic acid              | HMDB0000197 | C00954  | 0.008          | 0.085   | -0.90  | 1.2431 | 0.7859           | 0.855  | 0.11   | 0.248 | 0.6423             | 0.830  | 0.01   | 0.3086 | 0.0168 | 0.0428 |
| Organic Acids   | Fumaric acid                   | HMDB0000134 | C00122  | 0.0108         | 0.09813 | -0.77  | 1.9912 | 0.171            | 0.3151 | 0.461  | 0.744 | 0.55               | 0.811  | 0.15   | 0.1311 | 0.00   | 0.0025 |
| Organic Acids   | Azelaic acid                   | HMDB0000784 | C08261  | 0.004          | 0.066   | 1.06   | 1.3719 | <0.001           | 0.003  | 4.29   | 1.413 | 0.1223             | 0.300  | 0.60   | 1.0539 | 0.0004 | 0.0025 |
| Fatty Acids     | Sebacic acid                   | HMDB0000792 | C08277  | 0.0756         | 0.26378 | 0.421  | 1.2193 | <0.001           | 0.0037 | 2.926  | 0.773 | 0.0013             | 0.013  | 0.69   | 1.4755 | 0.00   | 0.0015 |
| Organic Acids   | alpha-Ketoisovaleric acid      | HMDB0000019 | C00141  | 0.485          | 0.653   | 0.12   | 0.8576 | 0.0028           | 0.014  | 1.79   | 1.206 | 0.9459             | 0.967  | -0.17  | 0.5712 | 0.0044 | 0.0162 |
| Benzenoids      | Phenylpyruvic acid             | HMDB0000205 | C00166  | 0.0614         | 0.24425 | 0.62   | 1.3036 | 0.014            | 0.0459 | 0.572  | 1.38  | 0.6678             | 0.846  | -0.07  | 0.3372 | 0.01   | 0.0267 |
| Amino Acids     | 2-Hydroxyglutaric acid         | HMDB0000606 | C01087  | 0.122          | 0.343   | 0.45   | 0.3595 | 0.0022           | 0.011  | 0.98   | 1.403 | 0.0094             | 0.060  | 0.86   | 1.3835 | 0.0013 | 0.0061 |
| Organic Acids   | Guanidoacetic acid             | HMDB0000128 | C00581  | 0.0015         | 0.03043 | -0.75  | 1.742  | <0.001           | 0.0037 | -0.67  | 1.629 | 0.0013             | 0.013  | -0.79  | 1.9507 | 0.00   | 0.0091 |
| Carbohydrates   | Gluconolactone                 | HMDB0000150 | C00198  | 0.012          | 0.104   | 0.27   | 1.2912 | <0.001           | 0.002  | 0.94   | 0.846 | 0.007              | 0.053  | 0.14   | 1.1524 | 0.0001 | 0.0012 |
| Carbohydrates   | Glyceric acid                  | HMDB0000139 | C00258  | 0.0015         | 0.03043 | 0.784  | 2.0707 | <0.001           | <0.001 | 0.886  | 2.061 | <0.001             | <0.001 | 0.79   | 2.1064 | 0.00   | 0.0025 |
| Amino Acids     | Proline                        | HMDB0000162 | C00148  | 0.035          | 0.183   | -0.35  | 1.3856 | 0.7825           | 0.855  | -0.05  | 0.285 | 0.0527             | 0.219  | 0.32   | 1.084  | 0.0016 | 0.0073 |
| Amino Acids     | Pipecolic acid                 | HMDB0000716 | C00408  | 0.7402         | 0.81835 | 0.027  | 0.5135 | 0.051            | 0.1258 | 0.326  | 1.352 | 0.1015             | 0.288  | -0.37  | 0.6057 | 0.01   | 0.0398 |
| Amino Acids     | N-Acetylserine                 | HMDB0002931 | -       | 0.377          | 0.597   | 0.04   | 0.6044 | <0.001           | 0.004  | 0.39   | 1.621 | 0.0551             | 0.219  | 0.07   | 0.7795 | 0.0009 | 0.0045 |
| Organic Acids   | Shikimic acid                  | HMDB0003070 | C00493  | 0.4572         | 0.64653 | 0.006  | 1.062  | <0.001           | <0.001 | 0.03   | 1.443 | 0.6527             | 0.838  | 0.00   | 0.8312 | 0.00   | 0.0165 |
| Carbohydrates   | N-Acetylneuraminic acid        | HMDB0000230 | C19910  | 0.017          | 0.123   | 0.18   | 1.2763 | <0.001           | <0.001 | 1.11   | 1.938 | <0.001             | 0.003  | 0.34   | 1.5079 | 3E-07  | <0.001 |
| SCFAs           | Acetic acid                    | HMDB0000042 | C00033  | 0.0756         | 0.26378 | 0.384  | 1.2805 | 0.740            | 0.8319 | -0.13  | 0.288 | 0.1115             | 0.288  | -0.41  | 0.9916 | 0.01   | 0.0186 |
| Amino Acids     | Pyroglutamic acid              | HMDB0000267 | C01879  | <0.001         | 0.002   | 1.01   | 2.1727 | <0.001           | <0.001 | 1.39   | 1.881 | <0.001             | <0.001 | 1.13   | 2.3065 | 6E-06  | <0.001 |
| Amino Acids     | 5-Aminolevulinic acid          | HMDB0001149 | C00430  | 0.2758         | 0.53291 | 0.099  | 0.4984 | 0.004            | 0.0203 | 0.383  | 1.413 | 0.0682             | 0.247  | 0.24   | 0.8973 | 0.01   | 0.0372 |
| Carbohydrates   | Glucose                        | HMDB0000122 | C00221  | 0.035          | 0.183   | 0.41   | 1.4496 | 0.6505           | 0.775  | -0.07  | 0.282 | 0.001              | 0.012  | -0.79  | 1.8431 | 8E-05  | 0.001  |
| Carbohydrates   | Maltose/Lactose                | -           | -       | 0.1015         | 0.30609 | 0.675  | 1.235  | <0.001           | <0.001 | 2.31   | 0.511 | 0.0043             | 0.035  | 1.30   | 1.9046 | 0.00   | <0.001 |
| Carbohydrates   | Maltotriose                    | HMDB0001262 | C01835  | 0.285          | 0.540   | 0.00   | 0.4261 | 0.0032           | 0.016  | 0.61   | 1.214 | 0.0281             | 0.151  | 0.30   | 1.2114 | 8E-05  | 0.001  |
| Organic Acids   | 2-Hydroxybutyric acid          | HMDB0000008 | C05984  | <0.001         | 0.00156 | 0.927  | 1.8588 | 0.006            | 0.0243 | 0.836  | 1.476 | 0.0144             | 0.087  | 0.50   | 1.1065 | 0.00   | 0.0019 |
| SCFAs           | 3-Hydroxyisovaleric acid       | HMDB0000754 | -       | 0.011          | 0.098   | 0.15   | 1.1381 | 0.0022           | 0.011  | 0.41   | 1.481 | 0.8079             | 0.908  | -0.08  | 0.119  | 0.0007 | 0.0035 |
| Carbohydrates   | Glutaconic acid                | HMDB0000620 | C02214  | 0.6573         | 0.7833  | -0.17  | 0.4907 | 0.002            | 0.0114 | 0.656  | 1.181 | 0.1841             | 0.412  | 0.44   | 0.679  | 0.00   | 0.0025 |
| Carbohydrates   | Xylose                         | HMDB0000098 | C00181  | 0.005          | 0.072   | 1.02   | 1.8583 | <0.001           | 0.004  | 0.84   | 1.316 | 0.0037             | 0.032  | 0.60   | 1.2375 | 0.0037 | 0.0139 |



|                       |                              |             |        |        |         |       |        |        |        |       |       |        |        |       |        |        |        |
|-----------------------|------------------------------|-------------|--------|--------|---------|-------|--------|--------|--------|-------|-------|--------|--------|-------|--------|--------|--------|
| Carbohydrates         | Ribulose                     | HMDB0000621 | C00309 | 0.1402 | 0.38217 | 0.163 | 0.7683 | <0.001 | <0.001 | 0.722 | 1.514 | <0.001 | <0.001 | 0.53  | 1.9111 | 0.00   | <0.001 |
| Carbohydrates         | Xylulose                     | HMDB0001644 | C00310 | 0.058  | 0.236   | 0.22  | 0.9864 | <0.001 | 0.003  | 1.03  | 1.383 | <0.001 | <0.001 | 0.50  | 1.644  | 4E-06  | <0.001 |
| Carbohydrates         | Fructose                     | HMDB0000660 | C02336 | 0.0188 | 0.12455 | 0.718 | 0.362  | <0.001 | 0.0019 | 2.252 | 1.201 | 0.0022 | 0.021  | 1.42  | 0.4771 | 0.00   | 0.001  |
| Carbohydrates         | N-Acetylglucosamine          | HMDB0000215 | C00140 | 0.874  | 0.922   | -0.07 | 0.6856 | <0.001 | 0.003  | 0.52  | 1.562 | 0.1208 | 0.300  | 0.18  | 0.7617 | 0.0013 | 0.0061 |
| SCFAs                 | Propanoic acid               | HMDB0000237 | C00163 | 0.0069 | 0.077   | 0.683 | 1.5451 | 0.027  | 0.0751 | 0.548 | 0.985 | 0.2654 | 0.539  | -0.34 | 0.7249 | 0.00   | 0.0025 |
| Amino Acids           | Tryptophan                   | HMDB0000929 | C00078 | 0.033  | 0.183   | -0.38 | 1.4182 | 0.0372 | 0.099  | -0.39 | 1.069 | 0.4663 | 0.754  | -0.10 | 0.4088 | 0.0201 | 0.0499 |
| SCFAs                 | Isobutyric acid              | HMDB0001873 | C02632 | 0.9472 | 0.97157 | -0.13 | 0.2896 | 0.023  | 0.0666 | 2.549 | 1.208 | 0.9472 | 0.967  | -0.20 | 0.2364 | 0.01   | 0.0367 |
| Benzenoids            | Mandelic acid                | HMDB0000703 | C01984 | 0.317  | 0.545   | 0.02  | 1.015  | <0.001 | 0.001  | 0.80  | 0.934 | 0.1115 | 0.288  | 0.04  | 0.6183 | 0.0006 | 0.0031 |
| Phenylpropanoic Acids | Phenyllactic acid            | HMDB0000779 | C01479 | 0.2062 | 0.45106 | 1.336 | 0.7125 | 0.001  | 0.0076 | 2.147 | 1.738 | 0.2875 | 0.561  | 1.19  | 0.6793 | 0.01   | 0.0228 |
| Organic Acids         | Maleic acid                  | HMDB0000176 | C01384 | <0.001 | 0.017   | -0.88 | 2.3177 | 0.0872 | 0.197  | 0.43  | 0.934 | 0.912  | 0.950  | -0.05 | 0.0033 | 7E-06  | <0.001 |
| Organic Acids         | Pimelic acid                 | HMDB0000857 | C02656 | 0.207  | 0.45106 | 14.13 | 0.344  | 0.010  | 0.0353 | 17.53 | 1.073 | 0.1242 | 0.301  | 15.41 | 0.754  | 0.02   | 0.0499 |
| SCFAs                 | 2-Methylpentanoic acid       | HMDB0031580 | -      | 0.075  | 0.264   | 0.36  | 0.889  | <0.001 | 0.002  | 0.98  | 1.757 | 0.1099 | 0.288  | 0.31  | 1.0539 | 6E-06  | <0.001 |
| Organic Acids         | Pyruvic acid                 | HMDB0000243 | C00022 | 0.1881 | 0.43524 | -0.48 | 0.2487 | 0.178  | 0.3249 | -0.37 | 0.768 | <0.001 | <0.001 | -1.57 | 2.3614 | 0.00   | 0.0015 |
| Bile Acids            | TCDCa                        | HMDB0000951 | C05465 | 0.118  | 0.343   | 2.22  | 0.3909 | <0.001 | 0.005  | 3.62  | 1.258 | 0.9092 | 0.950  | 0.45  | 0.0952 | 0.0004 | 0.0025 |
| Organic Acids         | Oxoglutaric acid             | HMDB0000208 | C00026 | 0.0442 | 0.20434 | 0.891 | 1.5354 | <0.001 | <0.001 | 0.879 | 1.487 | 0.3175 | 0.589  | 0.11  | 0.7912 | 0.00   | 0.0042 |
| Bile Acids            | GCA                          | HMDB0000138 | C01921 | 0.770  | 0.842   | 0.17  | 0.2691 | 0.0209 | 0.065  | 1.56  | 0.728 | 0.7357 | 0.871  | -0.16 | 0.5175 | 0.0162 | 0.0418 |
| Fatty Acids           | Octanoic acid                | HMDB0000482 | C06423 | 0.2786 | 0.53311 | -0.17 | 0.5476 | 0.069  | 0.1592 | 2.131 | 1.02  | 0.0977 | 0.288  | -0.25 | 1.2516 | 0.01   | 0.0278 |
| Bile Acids            | CDCA                         | HMDB0000518 | C02528 | 0.004  | 0.064   | -0.97 | 1.9874 | 0.0439 | 0.111  | -1.33 | 0.75  | 0.5801 | 0.813  | -0.20 | 0.0776 | 0.0098 | 0.0288 |
| Bile Acids            | DCA                          | HMDB0000626 | C04483 | 0.0442 | 0.20434 | -0.7  | 1.4687 | 0.013  | 0.045  | -1.57 | 1.445 | 0.0081 | 0.060  | -0.94 | 2.0178 | 0.01   | 0.0254 |
| Fatty Acids           | Nonanoic acid                | HMDB0000847 | C01601 | 0.705  | 0.792   | 0.10  | 0.3487 | 0.0228 | 0.067  | 0.77  | 1.153 | 0.8017 | 0.908  | -0.07 | 0.4145 | 0.0049 | 0.0174 |
| Fatty Acids           | Decanoic acid                | HMDB0000511 | C01571 | 0.4379 | 0.63142 | -0.31 | 0.5643 | 0.023  | 0.0666 | 3.266 | 1.14  | 0.2758 | 0.543  | -0.57 | 0.0595 | 0.00   | 0.0174 |
| Fatty Acids           | Undecylenic acid             | HMDB0033724 | C13910 | 0.544  | 0.705   | -0.13 | 0.0302 | <0.001 | 0.003  | -2.76 | 1.819 | 0.0032 | 0.029  | -1.60 | 1.9347 | 0.0005 | 0.0031 |
| Fatty Acids           | 5-Dodecenoic acid            | HMDB0000529 | -      | 0.0442 | 0.20434 | -0.98 | 1.0462 | 0.002  | 0.0114 | -1.6  | 0.837 | <0.001 | 0.011  | -1.51 | 1.8089 | 0.01   | 0.0257 |
| Fatty Acids           | 8,11,14-Eicosatrienoic acid  | HMDB0002925 | C03242 | 0.034  | 0.183   | 0.94  | 1.5072 | 0.0051 | 0.023  | 1.28  | 1.578 | 0.1815 | 0.410  | 0.53  | 0.7195 | 0.0141 | 0.0385 |
| Carnitines            | Propionylcarnitine           | HMDB0000824 | C03017 | 0.3696 | 0.59308 | 0.3   | 0.3817 | 0.006  | 0.0248 | 0.907 | 1.494 | 0.7572 | 0.886  | -0.08 | 0.343  | 0.01   | 0.0175 |
| Carnitines            | Malonylcarnitine             | HMDB0002095 | -      | 0.192  | 0.439   | -0.06 | 1.0785 | 0.0319 | 0.088  | 0.17  | 1.16  | 0.7739 | 0.890  | -0.02 | 0.0695 | 0.0101 | 0.0291 |
| Carnitines            | Butyrylcarnitine             | HMDB0002013 | C02862 | 0.6109 | 0.73675 | -0.04 | 0.5046 | 0.134  | 0.2606 | 0.463 | 0.842 | 0.0275 | 0.151  | -0.30 | 0.6959 | 0.02   | 0.0416 |
| Carnitines            | 2-Methylbutyrylcarnitine     | HMDB0000378 | -      | 0.024  | 0.156   | -0.17 | 1.4797 | 0.347  | 0.497  | 0.02  | 0.027 | 0.1461 | 0.346  | -0.16 | 1.2195 | 0.0031 | 0.0118 |
| Carnitines            | 3-Hydroxyisovalerylcarnitine | -           | -      | 0.0756 | 0.26378 | 0.176 | 0.7897 | <0.001 | 0.0019 | 0.624 | 1.551 | 0.0549 | 0.219  | 0.18  | 1.0826 | 0.00   | 0.0025 |
| Carnitines            | Glutaryl carnitine           | HMDB0013130 | -      | 0.007  | 0.077   | -1.10 | 1.9659 | 0.2514 | 0.407  | -0.35 | 0.618 | 0.4923 | 0.778  | -0.47 | 0.4844 | 0.0102 | 0.0291 |
| Carnitines            | Hexanoylcarnitine            | HMDB0000705 | -      | 0.0144 | 0.10987 | -0.36 | 1.5109 | 0.260  | 0.4081 | -0.22 | 0.255 | <0.001 | <0.001 | -0.61 | 2.1799 | 0.00   | 0.0025 |
| Carnitines            | Octanoylcarnitine            | HMDB0000791 | C02838 | <0.001 | 0.013   | -1.19 | 1.8693 | 0.0156 | 0.051  | -1.55 | 0.994 | <0.001 | 0.001  | -2.25 | 2.3595 | 0.0002 | 0.0019 |
| Carnitines            | Decanoylcarnitine C10        | HMDB0000651 | -      | <0.001 | 0.01124 | -1.04 | 1.929  | 0.011  | 0.0376 | -1.31 | 1.309 | <0.001 | <0.001 | -1.41 | 2.4164 | 0.00   | 0.0023 |
| Carnitines            | Lauroyl carnitine            | HMDB0002250 | -      | 0.056  | 0.232   | -0.32 | 1.5984 | <0.001 | 0.003  | -1.73 | 1.583 | <0.001 | 0.007  | -2.31 | 2.0478 | 0.0012 | 0.0058 |
| Carnitines            | Oleylcarnitine C18 1         | HMDB0005065 | -      | 0.441  | 0.63143 | 0.275 | 0.4818 | 0.009  | 0.0324 | 1.18  | 1.505 | 0.035  | 0.166  | 0.60  | 1.3856 | 0.01   | 0.0386 |
| Carnitines            | Linoleyl carnitine           | HMDB0006469 | -      | 0.184  | 0.430   | -0.81 | 0.5237 | 0.0132 | 0.045  | 1.03  | 1.236 | 0.0588 | 0.225  | 0.67  | 0.8809 | 0.0024 | 0.0098 |
| Bile Acids            | NorCA                        | -           | -      | 0.0039 | 0.0642  | 0.011 | 1.2554 | <0.001 | 0.0041 | 0.152 | 1.089 | 0.0229 | 0.130  | 0.00  | 0.5068 | 0.00   | 0.0086 |

**Table S6. 11 mtabolites of urea cycle and TCA cycle presented marked difference across stages in the discovery cohort by targeted metabolomics analysis (related to figure 3)**

| Class         | Name             | HMDB ID     | KEGG ID | Normal VS Mild |         |        |        | Normal VS Severe |        |        |       | Normal VS Recovery |        |        |        | Total  |         |
|---------------|------------------|-------------|---------|----------------|---------|--------|--------|------------------|--------|--------|-------|--------------------|--------|--------|--------|--------|---------|
|               |                  |             |         | P              | FDR     | log2FC | VIP    | P                | FDR    | log2FC | VIP   | P                  | FDR    | log2FC | VIP    | P      | FDR     |
| Amino Acids   | Proline          | HMDB0000162 | C00148  | 0.035          | 0.183   | -0.35  | 1.3856 | 0.7825           | 0.8547 | -0.05  | 0.285 | 0.0527             | 0.2194 | 0.318  | 1.084  | 0.002  | 0.007   |
| Amino Acids   | Creatine         | HMDB0000064 | C00300  | 0.2917         | 0.5432  | 0.341  | 0.6911 | 0.0036           | 0.0165 | 1.969  | 1.569 | 0.2758             | 0.5435 | -0.26  | 0.5015 | 0.0002 | 0.0019  |
| Amino Acids   | Aspartic acid    | HMDB0000191 | C00049  | <0.001         | 0.002   | 1.403  | 2.4534 | <0.001           | 0.0035 | 1.162  | 1.623 | <0.001             | <0.001 | 1.122  | 2.205  | 0.000  | 0.001   |
| Amino Acids   | Arginine         | HMDB0000517 | C00062  | 0.9143         | 0.94804 | 0.016  | 0.0469 | 0.0019           | 0.0113 | -0.48  | 1.643 | 0.0089             | 0.0603 | -0.37  | 1.3098 | 0.0025 | 0.00975 |
| Amino Acids   | Ornithine        | HMDB0000214 | C00077  | 0.031          | 0.182   | 0.371  | 1.5216 | <0.001           | 0.0035 | 0.981  | 1.794 | <0.001             | <0.001 | 1.557  | 2.314  | 0.000  | <0.001  |
| Amino Acids   | Glutamine        | HMDB0000641 | C00064  | 0.0373         | 0.18541 | -0.36  | 1.4032 | 0.0019           | 0.0113 | -0.62  | 1.791 | 0.0043             | 0.0346 | -0.48  | 1.8552 | 0.0019 | 0.00817 |
| Amino Acids   | Citrulline       | HMDB0000904 | C00327  | 0.007          | 0.077   | -0.59  | 1.7025 | 0.0233           | 0.0672 | -0.49  | 1.342 | 0.2564             | 0.5316 | -0.28  | 0.381  | 0.026  | 0.061   |
| Organic Acids | Pyruvic acid     | HMDB0000243 | C00022  | 0.1881         | 0.43524 | -0.48  | 0.2487 | 0.1783           | 0.3249 | -0.37  | 0.768 | <0.001             | <0.001 | -1.57  | 2.3614 | 0.0002 | 0.00146 |
| Organic Acids | Malic acid       | HMDB0000156 | C00149  | 0.426          | 0.631   | 0.163  | 0.3095 | <0.001           | 0.0037 | 0.711  | 1.387 | <0.001             | 0.0066 | 0.765  | 1.630  | 0.000  | 0.00102 |
| Organic Acids | Oxoglutaric acid | HMDB0000208 | C00026  | 0.0442         | 0.20434 | 0.891  | 1.5354 | <0.001           | <0.001 | 0.879  | 1.487 | 0.3175             | 0.5891 | 0.106  | 0.7912 | 0.0008 | 0.00425 |
| Organic Acids | Fumaric acid     | HMDB0000134 | C00122  | 0.011          | 0.098   | -0.77  | 1.9912 | 0.171            | 0.3151 | 0.461  | 0.744 | 0.55               | 0.8109 | 0.149  | 0.131  | 0.000  | 0.00246 |

**Table S7. 11 mtabolites in table S6 verified with marked difference across stages in the validation cohort by targeted metabolomics analysis (related to figure 3)**

| Class         | Name             | HMDB_ID     | KEGG_ID | Normal VS Mild |         |        |        | Normal VS Severe |        |        |       | Normal VS Recovery |        |        |        | Total  |        |
|---------------|------------------|-------------|---------|----------------|---------|--------|--------|------------------|--------|--------|-------|--------------------|--------|--------|--------|--------|--------|
|               |                  |             |         | P              | FDR     | log2FC | VIP    | P                | FDR    | log2FC | VIP   | P                  | FDR    | log2FC | VIP    | P      | FDR    |
| Amino Acids   | Proline          | HMDB0000162 | C00148  | 0.723          | 0.88364 | -0.04  | 0.1954 | 0.7449           | 0.7449 | -0.05  | 0.28  | 0.508              | 0.6985 | 0.087  | 0.387  | 0.674  | 0.674  |
| Amino Acids   | Creatine         | HMDB0000064 | C00300  | 1              | 1       | 0.055  | 0.74   | 0.0179           | 0.0543 | 0.621  | 0.8   | 0.1413             | 0.3108 | -0.47  | 1.1978 | 0.0011 | 0.0039 |
| Amino Acids   | Aspartic acid    | HMDB0000191 | C00049  | 0.000          | 0.00075 | 0.552  | 1.9226 | 0.0046           | 0.0256 | 0.602  | 1.198 | 0.0008             | 0.0086 | 0.487  | 1.673  | 0.0005 | 0.0027 |
| Amino Acids   | Arginine         | HMDB0000517 | C00062  | 0.5058         | 0.88364 | -0.11  | 0.2043 | 0.0221           | 0.0543 | -0.38  | 0.659 | 0.8748             | 0.8748 | 0.021  | 0.0217 | 0.1035 | 0.1423 |
| Amino Acids   | Ornithine        | HMDB0000214 | C00077  | 0.978          | 1       | -0.2   | 0.2909 | 0.0582           | 0.08   | 0.408  | 0.829 | 0.2403             | 0.4406 | 0.318  | 0.8414 | 0.215  | 0.263  |
| Amino Acids   | Glutamine        | HMDB0000641 | C00064  | 0.056          | 0.15388 | -0.21  | 1.3017 | 0.0247           | 0.0543 | -0.32  | 1.508 | 0.0491             | 0.1799 | -0.22  | 1.3212 | 0.0771 | 0.1212 |
| Amino Acids   | Citrulline       | HMDB0000904 | C00327  | 0.0098         | 0.03592 | -0.28  | 2.0044 | 0.046            | 0.0723 | -0.36  | 0.923 | 0.0793             | 0.218  | -0.28  | 1.0479 | 0.0734 | 0.1212 |
| Organic Acids | Pyruvic acid     | HMDB0000243 | C00022  | 0.6381         | 0.88364 | -0.14  | 0.2986 | 0.0721           | 0.0881 | -0.72  | 0.98  | 0.0017             | 0.0095 | -0.93  | 1.6329 | 0.0044 | 0.0121 |
| Organic Acids | Malic acid       | HMDB0000156 | C00149  | 0.7172         | 0.88364 | -0.27  | 0.1704 | 0.0315           | 0.0578 | 0.398  | 0.753 | 0.5817             | 0.711  | 0.045  | 0.4834 | 0.0707 | 0.1212 |
| Organic Acids | Oxoglutaric acid | HMDB0000208 | C00026  | 0.0015         | 0.00817 | 0.787  | 0.8295 | <0.001           | 0.0009 | 1.013  | 1.598 | 0.428              | 0.6726 | -0.28  | 0.3292 | <0.001 | <0.001 |
| Organic Acids | Fumaric acid     | HMDB0000134 | C00122  | 0.42           | 0.88364 | -0.48  | 0.2704 | 0.2221           | 0.2443 | 0.116  | 0.72  | 0.6796             | 0.7476 | -0.05  | 0.2367 | 0.2749 | 0.3024 |
